# Supplementary material for: Synthesis, structure and DFT study of dinuclear iron, cobalt and nickel complexes with cyclopentadienyl-metal moieties
Source: Royal Society of Chemistry journal article supplement (doi:10.1039/c0dt01386b), 2011-01-01
Supplement: c0dt01386b.pdf [file c0dt01386b.pdf]

## Supporting Information

### Crystallographic Data of Complexes 2, 3 and 8

#### Complex 2

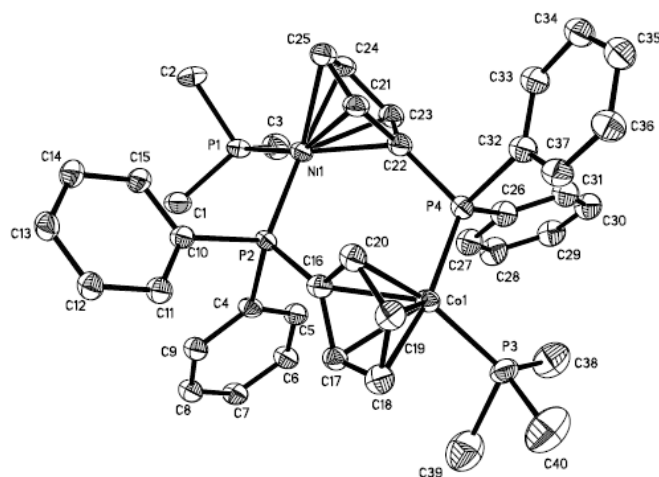

Table 1. Crystal data and structure refinement for complex 2.

|                             |                                                                                                                     |
|-----------------------------|---------------------------------------------------------------------------------------------------------------------|
| Identification code         | sun904a                                                                                                             |
| Empirical formula           | C <sub>40</sub> H <sub>46</sub> Co Ni P <sub>4</sub>                                                                |
| Formula weight              | 768.29                                                                                                              |
| Temperature                 | 298(2) K                                                                                                            |
| Wavelength                  | 0.71073 Å                                                                                                           |
| Crystal system, space group | Monoclinic, P2(1)/c                                                                                                 |
| Unit cell dimensions        | a = 25.604(5) Å    alpha = 90 deg.<br>b = 18.385(4) Å    beta = 98.91(3) deg.<br>c = 17.539(4) Å    gamma = 90 deg. |
| Volume                      | 8156(3) Å <sup>3</sup>                                                                                              |
| Z, Calculated density       | 8, 1.251 Mg/m <sup>3</sup>                                                                                          |

|                                   |                                             |
|-----------------------------------|---------------------------------------------|
| Absorption coefficient            | 1.050 mm <sup>-1</sup>                      |
| F(000)                            | 3208                                        |
| Crystal size                      | 0.31 x 0.30 x 0.27 mm                       |
| Theta range for data collection   | 1.37 to 25.66 deg.                          |
| Limiting indices                  | -30<=h<=15, -22<=k<=21, -20<=l<=21          |
| Reflections collected / unique    | 23945 / 13110 [R(int) = 0.1434]             |
| Completeness to theta = 25.66     | 84.8 %                                      |
| Absorption correction             | Semi-empirical from equivalents             |
| Max. and min. transmission        | 0.7646 and 0.7366                           |
| Refinement method                 | Full-matrix least-squares on F <sup>2</sup> |
| Data / restraints / parameters    | 13110 / 1626 / 841                          |
| Goodness-of-fit on F <sup>2</sup> | 0.946                                       |
| Final R indices [I>2sigma(I)]     | R1 = 0.1016, wR2 = 0.1963                   |
| R indices (all data)              | R1 = 0.2057, wR2 = 0.2367                   |
| Largest diff. peak and hole       | 0.654 and -0.578 e. Å <sup>-3</sup>         |

Table 2. Atomic coordinates ( $\times 10^4$ ) and equivalent isotropic displacement parameters ( $\text{\AA}^2 \times 10^3$ ) for complex 2.

U(eq) is defined as one third of the trace of the orthogonalized Uij tensor.

|        | x         | y        | z        | U(eq)  |
|--------|-----------|----------|----------|--------|
| Ni (1) | -8 (1)    | 6891 (1) | 4305 (1) | 34 (1) |
| Ni (2) | 5258 (1)  | 6872 (1) | 4805 (1) | 37 (1) |
| Co (1) | 1337 (1)  | 8110 (1) | 5459 (1) | 35 (1) |
| Co (2) | 6481 (1)  | 8381 (1) | 5786 (1) | 34 (1) |
| P (1)  | -820 (1)  | 6707 (1) | 4368 (2) | 36 (1) |
| P (2)  | 31 (1)    | 8036 (1) | 4471 (1) | 28 (1) |
| P (3)  | 1756 (2)  | 8207 (2) | 6609 (2) | 53 (1) |
| P (4)  | 1323 (1)  | 6965 (1) | 5298 (2) | 33 (1) |
| P (5)  | 5154 (1)  | 8002 (1) | 4936 (1) | 30 (1) |
| P (6)  | 4748 (2)  | 6687 (1) | 3739 (2) | 47 (1) |
| P (7)  | 6585 (1)  | 7242 (1) | 5646 (2) | 35 (1) |
| P (8)  | 7211 (2)  | 8803 (2) | 5534 (2) | 48 (1) |
| C (1)  | -1289 (6) | 7411 (6) | 4502 (7) | 54 (3) |
| C (2)  | -1193 (7) | 6285 (6) | 3503 (7) | 59 (3) |
| C (3)  | -949 (8)  | 6056 (7) | 5082 (8) | 65 (3) |
| C (4)  | -302 (5)  | 8396 (5) | 5250 (6) | 36 (2) |
| C (5)  | -240 (6)  | 7996 (5) | 5943 (6) | 41 (2) |
| C (6)  | -488 (6)  | 8225 (5) | 6541 (6) | 45 (2) |
| C (7)  | -806 (6)  | 8823 (5) | 6478 (6) | 42 (2) |
| C (8)  | -866 (6)  | 9220 (5) | 5812 (6) | 41 (2) |
| C (9)  | -626 (6)  | 9019 (5) | 5208 (6) | 39 (2) |
| C (10) | -251 (5)  | 8626 (5) | 3642 (6) | 35 (2) |
| C (11) | -126 (6)  | 9356 (5) | 3602 (6) | 41 (2) |
| C (12) | -338 (6)  | 9770 (5) | 2965 (6) | 41 (2) |
| C (13) | -682 (6)  | 9447 (6) | 2387 (6) | 45 (2) |
| C (14) | -804 (6)  | 8738 (6) | 2400 (6) | 45 (2) |
| C (15) | -593 (6)  | 8319 (5) | 3035 (6) | 41 (2) |
| C (16) | 675 (5)   | 8474 (5) | 4717 (6) | 37 (2) |
| C (17) | 820 (5)   | 8991 (5) | 5304 (6) | 39 (2) |
| C (18) | 1339 (6)  | 9222 (6) | 5293 (7) | 48 (2) |
| C (19) | 1526 (6)  | 8874 (5) | 4642 (7) | 45 (2) |
| C (20) | 1117 (5)  | 8403 (5) | 4311 (6) | 41 (2) |
| C (21) | 666 (6)   | 6710 (5) | 3822 (6) | 42 (2) |

|        |           |           |           |         |
|--------|-----------|-----------|-----------|---------|
| C (22) | 768 (6)   | 6561 (5)  | 4648 (6)  | 42 (2)  |
| C (23) | 434 (6)   | 5987 (5)  | 4772 (7)  | 45 (2)  |
| C (24) | 100 (6)   | 5816 (5)  | 4062 (6)  | 45 (2)  |
| C (25) | 269 (6)   | 6225 (6)  | 3466 (7)  | 48 (2)  |
| C (26) | 1304 (6)  | 6380 (6)  | 6141 (7)  | 48 (2)  |
| C (27) | 880 (7)   | 6481 (6)  | 6535 (7)  | 53 (2)  |
| C (28) | 827 (7)   | 6110 (7)  | 7203 (7)  | 60 (2)  |
| C (29) | 1208 (7)  | 5622 (6)  | 7477 (7)  | 54 (2)  |
| C (30) | 1631 (7)  | 5509 (6)  | 7113 (7)  | 54 (2)  |
| C (31) | 1681 (6)  | 5880 (6)  | 6415 (7)  | 50 (2)  |
| C (32) | 1876 (6)  | 6556 (6)  | 4857 (6)  | 46 (2)  |
| C (33) | 1843 (6)  | 5845 (6)  | 4557 (7)  | 49 (2)  |
| C (34) | 2238 (7)  | 5566 (7)  | 4197 (7)  | 54 (2)  |
| C (35) | 2685 (7)  | 5965 (6)  | 4173 (7)  | 56 (2)  |
| C (36) | 2730 (7)  | 6684 (6)  | 4448 (7)  | 56 (2)  |
| C (37) | 2307 (6)  | 6955 (7)  | 4801 (7)  | 52 (2)  |
| C (38) | 1804 (10) | 7552 (9)  | 7364 (10) | 94 (4)  |
| C (39) | 1441 (10) | 8899 (10) | 7205 (11) | 103 (5) |
| C (40) | 2295 (11) | 8812 (12) | 6742 (12) | 119 (5) |
| C (41) | 4221 (7)  | 6010 (6)  | 3783 (8)  | 61 (3)  |
| C (42) | 4344 (8)  | 7398 (7)  | 3170 (9)  | 68 (3)  |
| C (43) | 5076 (7)  | 6326 (7)  | 2997 (7)  | 66 (3)  |
| C (44) | 7614 (7)  | 9249 (7)  | 6345 (9)  | 64 (4)  |
| C (45) | 7147 (8)  | 9536 (7)  | 4831 (8)  | 67 (4)  |
| C (46) | 7716 (8)  | 8271 (7)  | 5211 (9)  | 70 (4)  |
| C (47) | 5162 (6)  | 8572 (5)  | 4060 (6)  | 43 (2)  |
| C (48) | 5502 (6)  | 8411 (6)  | 3610 (6)  | 45 (2)  |
| C (49) | 5562 (6)  | 8813 (6)  | 2952 (6)  | 46 (2)  |
| C (50) | 5216 (6)  | 9363 (6)  | 2759 (7)  | 47 (2)  |
| C (51) | 4843 (6)  | 9529 (6)  | 3173 (6)  | 45 (2)  |
| C (52) | 4799 (6)  | 9143 (5)  | 3852 (6)  | 41 (2)  |
| C (53) | 4571 (6)  | 8316 (5)  | 5331 (6)  | 40 (2)  |
| C (54) | 4161 (6)  | 7815 (6)  | 5378 (7)  | 47 (2)  |
| C (55) | 3721 (6)  | 8004 (6)  | 5703 (7)  | 53 (2)  |
| C (56) | 3681 (6)  | 8697 (6)  | 6001 (7)  | 51 (2)  |
| C (57) | 4079 (6)  | 9175 (6)  | 5978 (7)  | 48 (2)  |
| C (58) | 4530 (6)  | 8991 (6)  | 5647 (6)  | 43 (2)  |
| C (59) | 5894 (6)  | 6139 (6)  | 4876 (7)  | 45 (2)  |
| C (60) | 6010 (6)  | 6675 (5)  | 5470 (6)  | 42 (2)  |
| C (61) | 5576 (6)  | 6600 (6)  | 5914 (7)  | 45 (2)  |
| C (62) | 5231 (6)  | 6050 (6)  | 5611 (7)  | 49 (2)  |
| C (63) | 5422 (6)  | 5778 (6)  | 4968 (7)  | 46 (2)  |
| C (64) | 5649 (5)  | 8501 (5)  | 5582 (6)  | 40 (2)  |
| C (65) | 5855 (5)  | 8366 (5)  | 6381 (6)  | 40 (2)  |

|        |          |          |          |        |
|--------|----------|----------|----------|--------|
| C (66) | 6181 (6) | 8926 (5) | 6688 (6) | 40 (2) |
| C (67) | 6247 (5) | 9397 (5) | 6087 (6) | 41 (2) |
| C (68) | 5908 (5) | 9164 (5) | 5401 (6) | 38 (2) |
| C (69) | 6919 (6) | 6894 (6) | 4843 (7) | 49 (2) |
| C (70) | 6785 (6) | 7270 (6) | 4142 (7) | 49 (2) |
| C (71) | 6941 (6) | 7007 (7) | 3499 (7) | 56 (2) |
| C (72) | 7270 (6) | 6373 (7) | 3534 (7) | 54 (2) |
| C (73) | 7410 (6) | 6042 (7) | 4228 (7) | 55 (2) |
| C (74) | 7243 (6) | 6297 (6) | 4882 (7) | 51 (2) |
| C (75) | 6959 (6) | 6743 (6) | 6477 (7) | 53 (2) |
| C (76) | 6841 (7) | 6045 (7) | 6681 (7) | 56 (2) |
| C (77) | 7160 (7) | 5695 (8) | 7310 (8) | 65 (2) |
| C (78) | 7559 (8) | 6045 (8) | 7700 (9) | 68 (2) |
| C (79) | 7701 (7) | 6712 (8) | 7510 (8) | 68 (2) |
| C (80) | 7412 (7) | 7103 (7) | 6895 (8) | 60 (2) |

---

Table 3. Bond lengths [Å] and angles [deg] for complex 2.

---

|               |           |
|---------------|-----------|
| Ni (1)–C (24) | 2.050(10) |
| Ni (1)–C (21) | 2.063(15) |
| Ni (1)–C (22) | 2.074(13) |
| Ni (1)–C (23) | 2.103(11) |
| Ni (1)–C (25) | 2.120(13) |
| Ni (1)–P (2)  | 2.125(3)  |
| Ni (1)–P (1)  | 2.127(4)  |
| Ni (2)–C (61) | 2.052(11) |
| Ni (2)–C (63) | 2.066(11) |
| Ni (2)–C (62) | 2.078(12) |
| Ni (2)–C (59) | 2.103(13) |
| Ni (2)–P (5)  | 2.112(3)  |
| Ni (2)–C (60) | 2.123(12) |
| Ni (2)–P (6)  | 2.135(3)  |
| Co (1)–C (18) | 2.065(11) |
| Co (1)–C (20) | 2.076(10) |
| Co (1)–C (16) | 2.081(11) |
| Co (1)–C (17) | 2.084(11) |
| Co (1)–C (19) | 2.116(12) |
| Co (1)–P (4)  | 2.124(3)  |
| Co (1)–P (3)  | 2.140(3)  |
| Co (2)–C (65) | 2.043(15) |
| Co (2)–C (67) | 2.057(10) |
| Co (2)–C (68) | 2.092(11) |
| Co (2)–C (66) | 2.117(12) |
| Co (2)–C (64) | 2.117(14) |
| Co (2)–P (7)  | 2.128(3)  |
| Co (2)–P (8)  | 2.132(5)  |
| P (1)–C (3)   | 1.799(15) |
| P (1)–C (1)   | 1.804(14) |
| P (1)–C (2)   | 1.833(11) |
| P (2)–C (16)  | 1.826(13) |
| P (2)–C (4)   | 1.842(12) |
| P (2)–C (10)  | 1.867(9)  |
| P (3)–C (40)  | 1.76(2)   |
| P (3)–C (38)  | 1.779(17) |
| P (3)–C (39)  | 1.90(2)   |
| P (4)–C (26)  | 1.834(12) |
| P (4)–C (22)  | 1.836(12) |
| P (4)–C (32)  | 1.872(16) |

|             |           |
|-------------|-----------|
| P(5)–C(64)  | 1.811(11) |
| P(5)–C(53)  | 1.836(15) |
| P(5)–C(47)  | 1.862(12) |
| P(6)–C(43)  | 1.783(16) |
| P(6)–C(41)  | 1.846(16) |
| P(6)–C(42)  | 1.858(12) |
| P(7)–C(60)  | 1.792(14) |
| P(7)–C(75)  | 1.858(11) |
| P(7)–C(69)  | 1.870(14) |
| P(8)–C(46)  | 1.783(19) |
| P(8)–C(45)  | 1.818(14) |
| P(8)–C(44)  | 1.820(12) |
| C(4)–C(5)   | 1.408(14) |
| C(4)–C(9)   | 1.410(16) |
| C(5)–C(6)   | 1.374(18) |
| C(6)–C(7)   | 1.363(17) |
| C(7)–C(8)   | 1.365(14) |
| C(8)–C(9)   | 1.354(18) |
| C(10)–C(11) | 1.386(14) |
| C(10)–C(15) | 1.387(14) |
| C(11)–C(12) | 1.390(13) |
| C(12)–C(13) | 1.371(15) |
| C(13)–C(14) | 1.343(15) |
| C(14)–C(15) | 1.393(13) |
| C(16)–C(17) | 1.409(13) |
| C(16)–C(20) | 1.432(19) |
| C(17)–C(18) | 1.40(2)   |
| C(18)–C(19) | 1.45(2)   |
| C(19)–C(20) | 1.414(17) |
| C(21)–C(25) | 1.420(17) |
| C(21)–C(22) | 1.458(14) |
| C(22)–C(23) | 1.396(19) |
| C(23)–C(24) | 1.433(15) |
| C(24)–C(25) | 1.409(19) |
| C(26)–C(31) | 1.365(17) |
| C(26)–C(27) | 1.39(2)   |
| C(27)–C(28) | 1.380(18) |
| C(28)–C(29) | 1.36(2)   |
| C(29)–C(30) | 1.35(2)   |
| C(30)–C(31) | 1.425(17) |
| C(32)–C(37) | 1.34(2)   |
| C(32)–C(33) | 1.406(15) |
| C(33)–C(34) | 1.37(2)   |
| C(34)–C(35) | 1.37(2)   |

|                      |             |
|----------------------|-------------|
| C (35)–C (36)        | 1. 406 (16) |
| C (36)–C (37)        | 1. 42 (2)   |
| C (47)–C (48)        | 1. 29 (2)   |
| C (47)–C (52)        | 1. 413 (17) |
| C (48)–C (49)        | 1. 399 (16) |
| C (49)–C (50)        | 1. 352 (18) |
| C (50)–C (51)        | 1. 32 (2)   |
| C (51)–C (52)        | 1. 407 (16) |
| C (53)–C (58)        | 1. 369 (14) |
| C (53)–C (54)        | 1. 409 (18) |
| C (54)–C (55)        | 1. 38 (2)   |
| C (55)–C (56)        | 1. 388 (16) |
| C (56)–C (57)        | 1. 35 (2)   |
| C (57)–C (58)        | 1. 41 (2)   |
| C (59)–C (63)        | 1. 41 (2)   |
| C (59)–C (60)        | 1. 433 (14) |
| C (60)–C (61)        | 1. 46 (2)   |
| C (61)–C (62)        | 1. 392 (17) |
| C (62)–C (63)        | 1. 39 (2)   |
| C (64)–C (65)        | 1. 441 (14) |
| C (64)–C (68)        | 1. 448 (16) |
| C (65)–C (66)        | 1. 382 (15) |
| C (66)–C (67)        | 1. 394 (16) |
| C (67)–C (68)        | 1. 435 (14) |
| C (69)–C (74)        | 1. 372 (18) |
| C (69)–C (70)        | 1. 406 (16) |
| C (70)–C (71)        | 1. 343 (19) |
| C (71)–C (72)        | 1. 434 (19) |
| C (72)–C (73)        | 1. 358 (17) |
| C (73)–C (74)        | 1. 37 (2)   |
| C (75)–C (76)        | 1. 379 (18) |
| C (75)–C (80)        | 1. 43 (2)   |
| C (76)–C (77)        | 1. 421 (16) |
| C (77)–C (78)        | 1. 31 (2)   |
| C (78)–C (79)        | 1. 34 (2)   |
| C (79)–C (80)        | 1. 406 (17) |
| C (24)–Ni (1)–C (21) | 67. 1 (5)   |
| C (24)–Ni (1)–C (22) | 68. 0 (5)   |
| C (21)–Ni (1)–C (22) | 41. 3 (4)   |
| C (24)–Ni (1)–C (23) | 40. 3 (4)   |
| C (21)–Ni (1)–C (23) | 66. 4 (5)   |
| C (22)–Ni (1)–C (23) | 39. 0 (5)   |
| C (24)–Ni (1)–C (25) | 39. 5 (5)   |



|                   |            |
|-------------------|------------|
| C(21)–Ni(1)–C(25) | 39.7(5)    |
| C(22)–Ni(1)–C(25) | 67.9(5)    |
| C(23)–Ni(1)–C(25) | 66.2(5)    |
| C(24)–Ni(1)–P(2)  | 168.1(5)   |
| C(21)–Ni(1)–P(2)  | 101.0(3)   |
| C(22)–Ni(1)–P(2)  | 103.2(3)   |
| C(23)–Ni(1)–P(2)  | 135.9(3)   |
| C(25)–Ni(1)–P(2)  | 130.8(4)   |
| C(24)–Ni(1)–P(1)  | 91.2(4)    |
| C(21)–Ni(1)–P(1)  | 151.8(3)   |
| C(22)–Ni(1)–P(1)  | 147.0(3)   |
| C(23)–Ni(1)–P(1)  | 109.0(4)   |
| C(25)–Ni(1)–P(1)  | 112.3(4)   |
| P(2)–Ni(1)–P(1)   | 100.14(13) |
| C(61)–Ni(2)–C(63) | 65.7(4)    |
| C(61)–Ni(2)–C(62) | 39.4(5)    |
| C(63)–Ni(2)–C(62) | 39.2(5)    |
| C(61)–Ni(2)–C(59) | 66.3(5)    |
| C(63)–Ni(2)–C(59) | 39.5(6)    |
| C(62)–Ni(2)–C(59) | 66.4(6)    |
| C(61)–Ni(2)–P(5)  | 100.0(3)   |
| C(63)–Ni(2)–P(5)  | 165.8(3)   |
| C(62)–Ni(2)–P(5)  | 128.6(4)   |
| C(59)–Ni(2)–P(5)  | 137.2(4)   |
| C(61)–Ni(2)–C(60) | 40.9(5)    |
| C(63)–Ni(2)–C(60) | 67.1(5)    |
| C(62)–Ni(2)–C(60) | 68.0(5)    |
| C(59)–Ni(2)–C(60) | 39.6(4)    |
| P(5)–Ni(2)–C(60)  | 103.1(3)   |
| C(61)–Ni(2)–P(6)  | 153.0(4)   |
| C(63)–Ni(2)–P(6)  | 92.9(3)    |
| C(62)–Ni(2)–P(6)  | 113.6(4)   |
| C(59)–Ni(2)–P(6)  | 108.2(3)   |
| P(5)–Ni(2)–P(6)   | 100.47(11) |
| C(60)–Ni(2)–P(6)  | 146.5(3)   |
| C(18)–Co(1)–C(20) | 67.2(4)    |
| C(18)–Co(1)–C(16) | 67.2(5)    |
| C(20)–Co(1)–C(16) | 40.3(5)    |
| C(18)–Co(1)–C(17) | 39.4(5)    |
| C(20)–Co(1)–C(17) | 66.4(5)    |
| C(16)–Co(1)–C(17) | 39.6(4)    |
| C(18)–Co(1)–C(19) | 40.6(5)    |
| C(20)–Co(1)–C(19) | 39.4(5)    |
| C(16)–Co(1)–C(19) | 67.2(5)    |

|                      |             |
|----------------------|-------------|
| C (17)–Co (1)–C (19) | 66.6 (5)    |
| C (18)–Co (1)–P (4)  | 164.3 (4)   |
| C (20)–Co (1)–P (4)  | 97.6 (3)    |
| C (16)–Co (1)–P (4)  | 103.9 (3)   |
| C (17)–Co (1)–P (4)  | 139.2 (3)   |
| C (19)–Co (1)–P (4)  | 124.7 (4)   |
| C (18)–Co (1)–P (3)  | 92.2 (3)    |
| C (20)–Co (1)–P (3)  | 156.0 (3)   |
| C (16)–Co (1)–P (3)  | 143.5 (3)   |
| C (17)–Co (1)–P (3)  | 105.9 (3)   |
| C (19)–Co (1)–P (3)  | 116.6 (3)   |
| P (4)–Co (1)–P (3)   | 101.75 (11) |
| C (65)–Co (2)–C (67) | 66.3 (5)    |
| C (65)–Co (2)–C (68) | 66.9 (5)    |
| C (67)–Co (2)–C (68) | 40.5 (4)    |
| C (65)–Co (2)–C (66) | 38.8 (4)    |
| C (67)–Co (2)–C (66) | 39.0 (4)    |
| C (68)–Co (2)–C (66) | 66.3 (4)    |
| C (65)–Co (2)–C (64) | 40.5 (4)    |
| C (67)–Co (2)–C (64) | 67.8 (5)    |
| C (68)–Co (2)–C (64) | 40.2 (4)    |
| C (66)–Co (2)–C (64) | 66.7 (4)    |
| C (65)–Co (2)–P (7)  | 99.7 (3)    |
| C (67)–Co (2)–P (7)  | 165.9 (4)   |
| C (68)–Co (2)–P (7)  | 137.2 (3)   |
| C (66)–Co (2)–P (7)  | 128.2 (3)   |
| C (64)–Co (2)–P (7)  | 103.0 (3)   |
| C (65)–Co (2)–P (8)  | 153.2 (3)   |
| C (67)–Co (2)–P (8)  | 91.3 (4)    |
| C (68)–Co (2)–P (8)  | 106.0 (4)   |
| C (66)–Co (2)–P (8)  | 114.4 (4)   |
| C (64)–Co (2)–P (8)  | 144.9 (3)   |
| P (7)–Co (2)–P (8)   | 101.78 (15) |
| C (3)–P (1)–C (1)    | 100.9 (8)   |
| C (3)–P (1)–C (2)    | 99.6 (7)    |
| C (1)–P (1)–C (2)    | 98.0 (7)    |
| C (3)–P (1)–Ni (1)   | 115.3 (6)   |
| C (1)–P (1)–Ni (1)   | 124.6 (5)   |
| C (2)–P (1)–Ni (1)   | 114.4 (6)   |
| C (16)–P (2)–C (4)   | 99.8 (5)    |
| C (16)–P (2)–C (10)  | 98.9 (5)    |
| C (4)–P (2)–C (10)   | 101.6 (5)   |
| C (16)–P (2)–Ni (1)  | 119.4 (4)   |
| C (4)–P (2)–Ni (1)   | 116.1 (3)   |

|                  |           |
|------------------|-----------|
| C(10)-P(2)-Ni(1) | 117.7(3)  |
| C(40)-P(3)-C(38) | 111.5(9)  |
| C(40)-P(3)-C(39) | 83.9(12)  |
| C(38)-P(3)-C(39) | 91.7(10)  |
| C(40)-P(3)-Co(1) | 116.5(7)  |
| C(38)-P(3)-Co(1) | 127.7(6)  |
| C(39)-P(3)-Co(1) | 112.4(6)  |
| C(26)-P(4)-C(22) | 98.6(5)   |
| C(26)-P(4)-C(32) | 102.4(6)  |
| C(22)-P(4)-C(32) | 98.2(6)   |
| C(26)-P(4)-Co(1) | 118.4(4)  |
| C(22)-P(4)-Co(1) | 118.6(3)  |
| C(32)-P(4)-Co(1) | 117.1(4)  |
| C(64)-P(5)-C(53) | 97.8(5)   |
| C(64)-P(5)-C(47) | 97.8(5)   |
| C(53)-P(5)-C(47) | 104.4(6)  |
| C(64)-P(5)-Ni(2) | 118.6(4)  |
| C(53)-P(5)-Ni(2) | 118.3(4)  |
| C(47)-P(5)-Ni(2) | 116.5(4)  |
| C(43)-P(6)-C(41) | 102.1(7)  |
| C(43)-P(6)-C(42) | 99.0(8)   |
| C(41)-P(6)-C(42) | 98.5(8)   |
| C(43)-P(6)-Ni(2) | 113.9(5)  |
| C(41)-P(6)-Ni(2) | 115.0(4)  |
| C(42)-P(6)-Ni(2) | 124.9(4)  |
| C(60)-P(7)-C(75) | 99.0(6)   |
| C(60)-P(7)-C(69) | 97.5(6)   |
| C(75)-P(7)-C(69) | 100.5(6)  |
| C(60)-P(7)-Co(2) | 118.5(4)  |
| C(75)-P(7)-Co(2) | 117.0(4)  |
| C(69)-P(7)-Co(2) | 120.2(4)  |
| C(46)-P(8)-C(45) | 100.6(9)  |
| C(46)-P(8)-C(44) | 98.3(8)   |
| C(45)-P(8)-C(44) | 100.1(7)  |
| C(46)-P(8)-Co(2) | 124.7(5)  |
| C(45)-P(8)-Co(2) | 114.9(6)  |
| C(44)-P(8)-Co(2) | 114.3(7)  |
| C(5)-C(4)-C(9)   | 117.2(11) |
| C(5)-C(4)-P(2)   | 116.7(8)  |
| C(9)-C(4)-P(2)   | 126.1(8)  |
| C(6)-C(5)-C(4)   | 119.6(10) |
| C(7)-C(6)-C(5)   | 121.8(10) |
| C(6)-C(7)-C(8)   | 119.2(13) |
| C(9)-C(8)-C(7)   | 121.2(11) |

|                   |           |
|-------------------|-----------|
| C(8)–C(9)–C(4)    | 121.0(10) |
| C(11)–C(10)–C(15) | 118.7(9)  |
| C(11)–C(10)–P(2)  | 122.5(8)  |
| C(15)–C(10)–P(2)  | 118.9(7)  |
| C(10)–C(11)–C(12) | 120.4(10) |
| C(13)–C(12)–C(11) | 119.0(10) |
| C(14)–C(13)–C(12) | 122.1(10) |
| C(13)–C(14)–C(15) | 119.3(10) |
| C(10)–C(15)–C(14) | 120.6(9)  |
| C(17)–C(16)–C(20) | 106.6(11) |
| C(17)–C(16)–P(2)  | 126.6(11) |
| C(20)–C(16)–P(2)  | 126.6(8)  |
| C(17)–C(16)–Co(1) | 70.3(6)   |
| C(20)–C(16)–Co(1) | 69.7(7)   |
| P(2)–C(16)–Co(1)  | 128.7(5)  |
| C(18)–C(17)–C(16) | 109.7(12) |
| C(18)–C(17)–Co(1) | 69.6(7)   |
| C(16)–C(17)–Co(1) | 70.1(6)   |
| C(17)–C(18)–C(19) | 108.0(11) |
| C(17)–C(18)–Co(1) | 71.0(6)   |
| C(19)–C(18)–Co(1) | 71.6(6)   |
| C(20)–C(19)–C(18) | 106.1(14) |
| C(20)–C(19)–Co(1) | 68.8(6)   |
| C(18)–C(19)–Co(1) | 67.8(7)   |
| C(19)–C(20)–C(16) | 109.5(11) |
| C(19)–C(20)–Co(1) | 71.8(6)   |
| C(16)–C(20)–Co(1) | 70.0(6)   |
| C(25)–C(21)–C(22) | 109.0(11) |
| C(25)–C(21)–Ni(1) | 72.3(9)   |
| C(22)–C(21)–Ni(1) | 69.8(8)   |
| C(23)–C(22)–C(21) | 106.1(10) |
| C(23)–C(22)–P(4)  | 130.0(8)  |
| C(21)–C(22)–P(4)  | 122.9(10) |
| C(23)–C(22)–Ni(1) | 71.6(8)   |
| C(21)–C(22)–Ni(1) | 69.0(7)   |
| P(4)–C(22)–Ni(1)  | 132.6(6)  |
| C(22)–C(23)–C(24) | 109.2(10) |
| C(22)–C(23)–Ni(1) | 69.4(6)   |
| C(24)–C(23)–Ni(1) | 67.8(6)   |
| C(25)–C(24)–C(23) | 108.5(12) |
| C(25)–C(24)–Ni(1) | 72.9(6)   |
| C(23)–C(24)–Ni(1) | 71.8(6)   |
| C(24)–C(25)–C(21) | 106.9(10) |
| C(24)–C(25)–Ni(1) | 67.6(7)   |

|                      |            |
|----------------------|------------|
| C (21)–C (25)–Ni (1) | 68.0 (7)   |
| C (31)–C (26)–C (27) | 118.6 (12) |
| C (31)–C (26)–P (4)  | 125.0 (13) |
| C (27)–C (26)–P (4)  | 116.4 (9)  |
| C (28)–C (27)–C (26) | 123.0 (13) |
| C (29)–C (28)–C (27) | 117.9 (17) |
| C (30)–C (29)–C (28) | 121.2 (13) |
| C (29)–C (30)–C (31) | 121.1 (13) |
| C (26)–C (31)–C (30) | 118.2 (15) |
| C (37)–C (32)–C (33) | 118.9 (14) |
| C (37)–C (32)–P (4)  | 119.6 (9)  |
| C (33)–C (32)–P (4)  | 121.5 (11) |
| C (34)–C (33)–C (32) | 120.9 (14) |
| C (35)–C (34)–C (33) | 119.6 (13) |
| C (34)–C (35)–C (36) | 121.3 (15) |
| C (35)–C (36)–C (37) | 116.8 (14) |
| C (32)–C (37)–C (36) | 122.2 (12) |
| C (48)–C (47)–C (52) | 119.3 (11) |
| C (48)–C (47)–P (5)  | 118.0 (9)  |
| C (52)–C (47)–P (5)  | 122.6 (11) |
| C (47)–C (48)–C (49) | 123.6 (12) |
| C (50)–C (49)–C (48) | 116.7 (15) |
| C (51)–C (50)–C (49) | 122.4 (12) |
| C (50)–C (51)–C (52) | 120.6 (12) |
| C (51)–C (52)–C (47) | 117.2 (14) |
| C (58)–C (53)–C (54) | 117.7 (13) |
| C (58)–C (53)–P (5)  | 123.8 (10) |
| C (54)–C (53)–P (5)  | 118.3 (9)  |
| C (55)–C (54)–C (53) | 121.4 (12) |
| C (54)–C (55)–C (56) | 119.8 (13) |
| C (57)–C (56)–C (55) | 119.2 (15) |
| C (56)–C (57)–C (58) | 121.6 (12) |
| C (53)–C (58)–C (57) | 120.2 (12) |
| C (63)–C (59)–C (60) | 109.0 (13) |
| C (63)–C (59)–Ni (2) | 68.8 (8)   |
| C (60)–C (59)–Ni (2) | 70.9 (7)   |
| C (59)–C (60)–C (61) | 103.5 (11) |
| C (59)–C (60)–P (7)  | 126.7 (11) |
| C (61)–C (60)–P (7)  | 129.6 (8)  |
| C (59)–C (60)–Ni (2) | 69.4 (7)   |
| C (61)–C (60)–Ni (2) | 66.9 (7)   |
| P (7)–C (60)–Ni (2)  | 130.3 (5)  |
| C (62)–C (61)–C (60) | 110.8 (11) |
| C (62)–C (61)–Ni (2) | 71.3 (6)   |

|                      |            |
|----------------------|------------|
| C (60)–C (61)–Ni (2) | 72.2 (7)   |
| C (63)–C (62)–C (61) | 106.8 (14) |
| C (63)–C (62)–Ni (2) | 69.9 (7)   |
| C (61)–C (62)–Ni (2) | 69.3 (7)   |
| C (62)–C (63)–C (59) | 109.8 (11) |
| C (62)–C (63)–Ni (2) | 70.9 (6)   |
| C (59)–C (63)–Ni (2) | 71.7 (7)   |
| C (65)–C (64)–C (68) | 104.3 (9)  |
| C (65)–C (64)–P (5)  | 129.6 (9)  |
| C (68)–C (64)–P (5)  | 126.1 (8)  |
| C (65)–C (64)–Co (2) | 67.0 (7)   |
| C (68)–C (64)–Co (2) | 69.0 (8)   |
| P (5)–C (64)–Co (2)  | 129.9 (6)  |
| C (66)–C (65)–C (64) | 111.1 (10) |
| C (66)–C (65)–Co (2) | 73.5 (9)   |
| C (64)–C (65)–Co (2) | 72.5 (8)   |
| C (65)–C (66)–C (67) | 107.7 (9)  |
| C (65)–C (66)–Co (2) | 67.7 (7)   |
| C (67)–C (66)–Co (2) | 68.2 (7)   |
| C (66)–C (67)–C (68) | 108.8 (10) |
| C (66)–C (67)–Co (2) | 72.8 (6)   |
| C (68)–C (67)–Co (2) | 71.1 (6)   |
| C (67)–C (68)–C (64) | 107.8 (9)  |
| C (67)–C (68)–Co (2) | 68.4 (6)   |
| C (64)–C (68)–Co (2) | 70.8 (6)   |
| C (74)–C (69)–C (70) | 120.1 (13) |
| C (74)–C (69)–P (7)  | 125.4 (10) |
| C (70)–C (69)–P (7)  | 114.4 (9)  |
| C (71)–C (70)–C (69) | 119.6 (12) |
| C (70)–C (71)–C (72) | 120.4 (12) |
| C (73)–C (72)–C (71) | 118.3 (13) |
| C (72)–C (73)–C (74) | 121.6 (13) |
| C (73)–C (74)–C (69) | 119.9 (12) |
| C (76)–C (75)–C (80) | 119.3 (11) |
| C (76)–C (75)–P (7)  | 123.8 (10) |
| C (80)–C (75)–P (7)  | 116.7 (10) |
| C (75)–C (76)–C (77) | 120.0 (14) |
| C (78)–C (77)–C (76) | 119.5 (15) |
| C (77)–C (78)–C (79) | 122.8 (13) |
| C (78)–C (79)–C (80) | 122.0 (15) |
| C (79)–C (80)–C (75) | 116.3 (14) |

---

Symmetry transformations used to generate equivalent atoms:



Table 4. Anisotropic displacement parameters ( $\text{\AA}^2 \times 10^3$ ) for complex 2.  
 The anisotropic displacement factor exponent takes the form:  
 $-2 \pi^2 [ h^2 a^{*2} U_{11} + \dots + 2 h k a^* b^* U_{12} ]$

|        | U11   | U22   | U33   | U23    | U13    | U12   |
|--------|-------|-------|-------|--------|--------|-------|
| Ni (1) | 46(1) | 27(1) | 30(1) | -1(1)  | 9(1)   | 5(1)  |
| Ni (2) | 47(1) | 28(1) | 37(1) | -1(1)  | 12(1)  | -1(1) |
| Co(1)  | 44(1) | 27(1) | 33(1) | 3(1)   | 6(1)   | 1(1)  |
| Co(2)  | 37(1) | 35(1) | 32(1) | -8(1)  | 6(1)   | 5(1)  |
| P(1)   | 42(2) | 30(1) | 38(1) | -7(1)  | 11(1)  | -2(1) |
| P(2)   | 36(2) | 24(1) | 26(1) | 2(1)   | 10(1)  | 5(1)  |
| P(3)   | 67(3) | 37(2) | 48(2) | 1(1)   | -11(2) | -7(1) |
| P(4)   | 39(2) | 32(1) | 29(1) | 6(1)   | 9(1)   | 4(1)  |
| P(5)   | 40(2) | 23(1) | 28(1) | -2(1)  | 4(1)   | -1(1) |
| P(6)   | 62(3) | 36(1) | 41(2) | -10(1) | 2(2)   | -1(1) |
| P(7)   | 39(2) | 38(1) | 30(1) | -1(1)  | 7(1)   | 10(1) |
| P(8)   | 36(2) | 50(2) | 57(2) | -21(1) | 11(2)  | -1(1) |
| C(1)   | 57(7) | 47(5) | 56(5) | -15(5) | 7(5)   | -2(5) |
| C(2)   | 72(8) | 51(5) | 51(6) | -23(5) | 0(6)   | -5(5) |
| C(3)   | 78(8) | 55(6) | 61(6) | 1(5)   | 12(7)  | 1(6)  |
| C(4)   | 52(4) | 31(3) | 27(3) | -1(3)  | 11(3)  | 3(3)  |
| C(5)   | 57(4) | 35(3) | 32(3) | 2(3)   | 6(3)   | 2(3)  |
| C(6)   | 61(5) | 39(4) | 35(4) | 3(3)   | 13(4)  | 6(4)  |
| C(7)   | 60(5) | 42(4) | 28(3) | 0(3)   | 17(4)  | 2(4)  |
| C(8)   | 55(5) | 36(3) | 33(4) | 4(3)   | 14(4)  | 3(3)  |
| C(9)   | 54(4) | 32(3) | 30(3) | 7(3)   | 10(3)  | 2(3)  |
| C(10)  | 49(4) | 32(3) | 27(3) | 3(3)   | 8(3)   | 1(3)  |
| C(11)  | 54(4) | 36(3) | 33(3) | 6(3)   | 8(3)   | 2(3)  |
| C(12)  | 53(5) | 37(3) | 34(4) | 9(3)   | 9(4)   | 3(3)  |
| C(13)  | 56(5) | 42(4) | 36(4) | 9(3)   | 6(4)   | 9(4)  |
| C(14)  | 53(5) | 46(4) | 35(4) | 6(3)   | 2(4)   | 2(4)  |
| C(15)  | 49(4) | 39(3) | 33(3) | 2(3)   | 2(4)   | 2(3)  |
| C(16)  | 53(3) | 30(3) | 30(3) | 4(2)   | 9(3)   | 1(3)  |
| C(17)  | 51(4) | 32(3) | 33(3) | 1(3)   | 5(3)   | 4(3)  |
| C(18)  | 57(5) | 44(4) | 41(4) | 8(3)   | 7(4)   | -3(4) |
| C(19)  | 52(5) | 42(4) | 43(4) | 9(4)   | 10(4)  | -8(4) |
| C(20)  | 51(4) | 36(3) | 35(3) | 8(3)   | 10(3)  | 2(3)  |
| C(21)  | 55(4) | 39(3) | 32(3) | -4(3)  | 9(3)   | 7(3)  |
| C(22)  | 57(3) | 36(3) | 33(3) | 2(3)   | 6(3)   | 8(3)  |



|       |         |         |       |        |        |        |
|-------|---------|---------|-------|--------|--------|--------|
| C(23) | 59(4)   | 37(3)   | 39(3) | 3(3)   | 9(3)   | 8(3)   |
| C(24) | 62(5)   | 34(4)   | 40(4) | -5(3)  | 8(4)   | 6(4)   |
| C(25) | 59(5)   | 41(4)   | 41(4) | -5(3)  | 6(4)   | 8(4)   |
| C(26) | 63(4)   | 45(3)   | 36(3) | 7(3)   | 8(3)   | 2(3)   |
| C(27) | 67(4)   | 55(4)   | 37(3) | 8(3)   | 5(3)   | 4(3)   |
| C(28) | 73(5)   | 66(4)   | 41(4) | 12(4)  | 10(4)  | -1(4)  |
| C(29) | 73(5)   | 56(4)   | 35(4) | 10(4)  | 11(4)  | -5(4)  |
| C(30) | 69(5)   | 49(4)   | 40(4) | 9(4)   | 3(4)   | 2(4)   |
| C(31) | 66(4)   | 46(3)   | 37(3) | 9(3)   | 6(3)   | 5(3)   |
| C(32) | 60(4)   | 42(3)   | 36(3) | 4(3)   | 8(3)   | 4(3)   |
| C(33) | 60(4)   | 45(3)   | 43(3) | 3(3)   | 11(3)  | 5(3)   |
| C(34) | 62(5)   | 51(4)   | 49(4) | 0(4)   | 14(4)  | 9(4)   |
| C(35) | 62(5)   | 57(4)   | 51(4) | 5(4)   | 13(4)  | 9(4)   |
| C(36) | 64(5)   | 52(4)   | 56(4) | 1(4)   | 18(4)  | 1(4)   |
| C(37) | 60(5)   | 49(4)   | 48(4) | -4(4)  | 14(4)  | 2(4)   |
| C(38) | 103(8)  | 107(7)  | 70(6) | -4(6)  | 2(7)   | -10(7) |
| C(39) | 99(10)  | 132(9)  | 78(8) | -3(8)  | 8(8)   | -4(8)  |
| C(40) | 111(11) | 159(10) | 81(9) | -5(9)  | 1(9)   | -29(9) |
| C(41) | 77(8)   | 55(6)   | 52(6) | -18(5) | 11(6)  | -12(6) |
| C(42) | 77(8)   | 57(6)   | 60(6) | -7(5)  | -15(6) | 2(6)   |
| C(43) | 87(9)   | 66(6)   | 45(6) | -25(5) | 10(6)  | -1(6)  |
| C(44) | 49(8)   | 66(7)   | 78(7) | -13(6) | 16(7)  | -18(6) |
| C(45) | 64(8)   | 70(6)   | 69(7) | -9(6)  | 20(7)  | -19(6) |
| C(46) | 65(8)   | 71(7)   | 78(7) | -20(6) | 23(7)  | -10(6) |
| C(47) | 51(4)   | 40(3)   | 39(3) | -3(3)  | 10(3)  | -2(3)  |
| C(48) | 53(4)   | 44(3)   | 39(3) | -1(3)  | 8(3)   | -1(3)  |
| C(49) | 55(5)   | 48(4)   | 36(4) | 4(3)   | 12(4)  | -3(4)  |
| C(50) | 57(5)   | 44(4)   | 41(4) | 4(3)   | 11(4)  | -4(4)  |
| C(51) | 54(5)   | 41(4)   | 40(4) | 0(3)   | 10(4)  | -2(4)  |
| C(52) | 50(4)   | 39(3)   | 36(3) | 3(3)   | 8(3)   | -1(3)  |
| C(53) | 46(4)   | 38(3)   | 38(3) | 2(3)   | 11(3)  | 2(3)   |
| C(54) | 48(5)   | 47(4)   | 49(4) | -4(4)  | 20(4)  | -8(4)  |
| C(55) | 53(5)   | 53(4)   | 56(4) | -4(4)  | 16(4)  | -1(4)  |
| C(56) | 51(5)   | 53(4)   | 51(4) | -2(4)  | 17(4)  | 0(4)   |
| C(57) | 52(5)   | 48(4)   | 46(4) | -3(4)  | 16(4)  | -1(4)  |
| C(58) | 49(4)   | 41(3)   | 41(3) | -2(3)  | 11(3)  | 0(3)   |
| C(59) | 52(4)   | 46(3)   | 39(3) | 0(3)   | 10(3)  | 9(3)   |
| C(60) | 50(3)   | 41(3)   | 37(3) | -3(3)  | 10(3)  | 10(3)  |
| C(61) | 53(4)   | 40(3)   | 42(3) | 3(3)   | 9(3)   | 9(3)   |
| C(62) | 54(5)   | 45(4)   | 49(4) | 6(4)   | 14(4)  | 5(4)   |
| C(63) | 51(5)   | 41(4)   | 46(4) | 3(3)   | 11(4)  | 5(4)   |
| C(64) | 47(3)   | 37(3)   | 35(3) | -2(3)  | 9(3)   | 4(3)   |
| C(65) | 47(4)   | 38(3)   | 34(3) | -3(3)  | 9(3)   | 3(3)   |
| C(66) | 46(5)   | 40(4)   | 34(4) | -8(3)  | 9(4)   | -1(4)  |

|       |       |       |       |        |       |       |
|-------|-------|-------|-------|--------|-------|-------|
| C(67) | 45(5) | 35(4) | 43(4) | -10(3) | 8(4)  | -1(3) |
| C(68) | 44(4) | 34(3) | 36(3) | -1(3)  | 9(3)  | 0(3)  |
| C(69) | 53(4) | 51(3) | 42(3) | -5(3)  | 10(3) | 9(3)  |
| C(70) | 54(4) | 56(4) | 40(3) | -10(3) | 13(3) | 4(3)  |
| C(71) | 57(5) | 66(4) | 46(4) | -9(4)  | 15(4) | 4(4)  |
| C(72) | 51(5) | 66(4) | 47(4) | -14(4) | 14(4) | -1(4) |
| C(73) | 55(5) | 61(4) | 49(4) | -15(4) | 13(4) | 8(4)  |
| C(74) | 54(4) | 57(3) | 43(3) | -6(3)  | 10(3) | 10(3) |
| C(75) | 57(4) | 58(3) | 45(3) | -2(3)  | 7(3)  | 16(3) |
| C(76) | 58(4) | 59(3) | 49(3) | 3(3)   | 6(3)  | 18(3) |
| C(77) | 66(5) | 72(4) | 57(4) | 7(4)   | 5(4)  | 26(4) |
| C(78) | 67(5) | 78(4) | 58(4) | 2(4)   | 4(4)  | 23(4) |
| C(79) | 65(5) | 79(4) | 59(4) | -6(4)  | 2(4)  | 22(4) |
| C(80) | 58(4) | 69(4) | 50(4) | -4(3)  | 2(4)  | 19(4) |

---

Table 5. Hydrogen coordinates ( $\times 10^4$ ) and isotropic displacement parameters ( $\text{\AA}^2 \times 10^3$ ) for complex 2.

|       | x     | y     | z    | U(eq) |
|-------|-------|-------|------|-------|
| H(1A) | -1641 | 7219  | 4392 | 80    |
| H(1B) | -1252 | 7808  | 4159 | 80    |
| H(1C) | -1222 | 7580  | 5026 | 80    |
| H(2A) | -1026 | 5837  | 3397 | 89    |
| H(2B) | -1200 | 6609  | 3072 | 89    |
| H(2C) | -1548 | 6189  | 3589 | 89    |
| H(3A) | -794  | 6222  | 5585 | 97    |
| H(3B) | -799  | 5595  | 4978 | 97    |
| H(3C) | -1324 | 6003  | 5063 | 97    |
| H(5)  | -32   | 7579  | 5996 | 50    |
| H(6)  | -437  | 7965  | 7002 | 53    |
| H(7)  | -981  | 8959  | 6883 | 50    |
| H(8)  | -1075 | 9636  | 5772 | 49    |
| H(9)  | -677  | 9296  | 4759 | 46    |
| H(11) | 102   | 9571  | 4004 | 49    |
| H(12) | -248  | 10258 | 2933 | 49    |
| H(13) | -835  | 9729  | 1971 | 54    |
| H(14) | -1028 | 8528  | 1991 | 54    |
| H(15) | -681  | 7829  | 3053 | 49    |
| H(17) | 595   | 9153  | 5676 | 47    |
| H(18) | 1534  | 9579  | 5642 | 57    |
| H(19) | 1871  | 8944  | 4474 | 55    |
| H(20) | 1130  | 8084  | 3867 | 49    |
| H(21) | 849   | 7074  | 3553 | 50    |
| H(23) | 412   | 5763  | 5273 | 54    |
| H(24) | -176  | 5442  | 3993 | 54    |
| H(25) | 125   | 6201  | 2915 | 57    |
| H(27) | 620   | 6814  | 6341 | 64    |
| H(28) | 539   | 6191  | 7457 | 72    |
| H(29) | 1179  | 5361  | 7923 | 65    |
| H(30) | 1892  | 5183  | 7322 | 64    |
| H(31) | 1962  | 5784  | 6153 | 60    |
| H(33) | 1549  | 5560  | 4603 | 59    |
| H(34) | 2201  | 5107  | 3971 | 65    |
| H(35) | 2965  | 5757  | 3970 | 67    |

|        |      |      |      |     |
|--------|------|------|------|-----|
| H(36)  | 3024 | 6969 | 4401 | 68  |
| H(37)  | 2329 | 7424 | 5000 | 62  |
| H(38A) | 2117 | 7643 | 7729 | 142 |
| H(38B) | 1822 | 7073 | 7151 | 142 |
| H(38C) | 1499 | 7587 | 7618 | 142 |
| H(39A) | 1101 | 8725 | 7290 | 155 |
| H(39B) | 1399 | 9354 | 6933 | 155 |
| H(39C) | 1664 | 8968 | 7692 | 155 |
| H(40A) | 2223 | 9215 | 6393 | 178 |
| H(40B) | 2607 | 8564 | 6643 | 178 |
| H(40C) | 2348 | 8988 | 7264 | 178 |
| H(41A) | 4065 | 5876 | 3269 | 92  |
| H(41B) | 3955 | 6216 | 4049 | 92  |
| H(41C) | 4369 | 5586 | 4055 | 92  |
| H(42A) | 4573 | 7767 | 3018 | 102 |
| H(42B) | 4107 | 7612 | 3479 | 102 |
| H(42C) | 4145 | 7181 | 2718 | 102 |
| H(43A) | 5305 | 5936 | 3203 | 99  |
| H(43B) | 5282 | 6702 | 2805 | 99  |
| H(43C) | 4819 | 6145 | 2584 | 99  |
| H(44A) | 7760 | 8891 | 6716 | 96  |
| H(44B) | 7400 | 9583 | 6583 | 96  |
| H(44C) | 7896 | 9510 | 6166 | 96  |
| H(45A) | 7485 | 9765 | 4836 | 100 |
| H(45B) | 6898 | 9888 | 4959 | 100 |
| H(45C) | 7026 | 9343 | 4326 | 100 |
| H(46A) | 7590 | 8084 | 4705 | 105 |
| H(46B) | 7809 | 7874 | 5561 | 105 |
| H(46C) | 8022 | 8570 | 5192 | 105 |
| H(48)  | 5717 | 8007 | 3731 | 54  |
| H(49)  | 5827 | 8707 | 2661 | 55  |
| H(50)  | 5242 | 9635 | 2319 | 56  |
| H(51)  | 4607 | 9904 | 3013 | 54  |
| H(52)  | 4541 | 9259 | 4153 | 49  |
| H(54)  | 4187 | 7347 | 5186 | 56  |
| H(55)  | 3452 | 7667 | 5721 | 64  |
| H(56)  | 3385 | 8831 | 6214 | 61  |
| H(57)  | 4055 | 9637 | 6186 | 57  |
| H(58)  | 4799 | 9329 | 5643 | 52  |
| H(59)  | 6105 | 6044 | 4466 | 55  |
| H(61)  | 5536 | 6890 | 6371 | 54  |
| H(62)  | 4918 | 5881 | 5817 | 58  |
| H(63)  | 5258 | 5386 | 4636 | 55  |
| H(65)  | 5758 | 7948 | 6676 | 47  |

|       |      |      |      |    |
|-------|------|------|------|----|
| H(66) | 6355 | 8966 | 7225 | 48 |
| H(67) | 6467 | 9835 | 6135 | 49 |
| H(68) | 5861 | 9410 | 4899 | 46 |
| H(70) | 6589 | 7697 | 4123 | 59 |
| H(71) | 6834 | 7236 | 3028 | 67 |
| H(72) | 7386 | 6194 | 3093 | 65 |
| H(73) | 7624 | 5632 | 4259 | 65 |
| H(74) | 7348 | 6065 | 5352 | 62 |
| H(76) | 6552 | 5803 | 6407 | 67 |
| H(77) | 7086 | 5220 | 7443 | 79 |
| H(78) | 7753 | 5820 | 8128 | 82 |
| H(79) | 8000 | 6925 | 7792 | 82 |
| H(80) | 7510 | 7569 | 6767 | 72 |

---

Table 6. Torsion angles [deg] for complex 2.

Complex 3

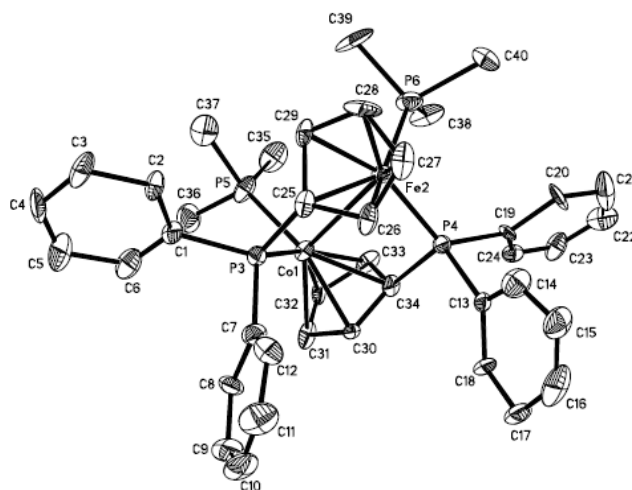

Table 1. Crystal data and structure refinement for Complex 3

|                             |                                                                                                                        |
|-----------------------------|------------------------------------------------------------------------------------------------------------------------|
| Identification code         | test                                                                                                                   |
| Empirical formula           | C <sub>40</sub> H <sub>46</sub> Co Fe P <sub>4</sub>                                                                   |
| Formula weight              | 765.43                                                                                                                 |
| Temperature                 | 298(2) K                                                                                                               |
| Wavelength                  | 0.71073 Å                                                                                                              |
| Crystal system, space group | Monoclinic, Cc                                                                                                         |
| Unit cell dimensions        | a = 13.2681(19) Å    alpha = 90 deg.<br>b = 15.846(2) Å    beta = 93.362(2) deg.<br>c = 17.926(3) Å    gamma = 90 deg. |

|                                   |                                             |
|-----------------------------------|---------------------------------------------|
| Volume                            | 3762.4(10) Å <sup>3</sup>                   |
| Z, Calculated density             | 4, 1.351 Mg/m <sup>3</sup>                  |
| Absorption coefficient            | 1.024 mm <sup>-1</sup>                      |
| F(000)                            | 1596                                        |
| Crystal size                      | 0.18 x 0.15 x 0.12 mm                       |
| Theta range for data collection   | 2.00 to 27.52 deg.                          |
| Limiting indices                  | -16<=h<=17, -18<=k<=20, -23<=l<=17          |
| Reflections collected / unique    | 10802 / 6063 [R(int) = 0.0253]              |
| Completeness to theta = 27.52     | 97.8 %                                      |
| Absorption correction             | Semi-empirical from equivalents             |
| Max. and min. transmission        | 0.8870 and 0.8372                           |
| Refinement method                 | Full-matrix least-squares on F <sup>2</sup> |
| Data / restraints / parameters    | 6063 / 2 / 421                              |
| Goodness-of-fit on F <sup>2</sup> | 1.022                                       |
| Final R indices [I>2sigma(I)]     | R1 = 0.0450, wR2 = 0.1161                   |
| R indices (all data)              | R1 = 0.0581, wR2 = 0.1243                   |
| Absolute structure parameter      | 0.20(4)                                     |
| Largest diff. peak and hole       | 0.726 and -0.362 e.Å <sup>-3</sup>          |

Table 2. Atomic coordinates ( $\times 10^4$ ) and equivalent isotropic displacement parameters ( $\text{\AA}^2 \times 10^3$ ) for Complex 3

U(eq) is defined as one third of the trace of the orthogonalized Uij tensor.

|       | x        | y        | z        | U(eq) |
|-------|----------|----------|----------|-------|
| Co(1) | 8002(1)  | 2906(1)  | 3430(1)  | 33(1) |
| Fe(2) | 5950(1)  | 2903(1)  | 3953(1)  | 30(1) |
| P(3)  | 7101(2)  | 2280(2)  | 2550(2)  | 29(1) |
| P(4)  | 6853(2)  | 2269(2)  | 4816(2)  | 27(1) |
| P(5)  | 8145(3)  | 4124(2)  | 2874(2)  | 45(1) |
| P(6)  | 5810(3)  | 4111(2)  | 4513(2)  | 48(1) |
| C(1)  | 6949(9)  | 2591(7)  | 1557(6)  | 36(3) |
| C(2)  | 5975(10) | 2730(8)  | 1217(7)  | 39(3) |
| C(3)  | 5917(13) | 2948(8)  | 416(8)   | 60(4) |
| C(4)  | 6831(14) | 2983(9)  | 40(7)    | 67(5) |
| C(5)  | 7705(11) | 2769(9)  | 373(8)   | 69(4) |
| C(6)  | 7738(10) | 2577(9)  | 1159(7)  | 58(4) |
| C(7)  | 7317(10) | 1153(8)  | 2389(7)  | 43(3) |
| C(8)  | 8373(10) | 932(8)   | 2283(8)  | 42(3) |
| C(9)  | 8597(12) | 72(10)   | 2159(8)  | 71(5) |
| C(10) | 7797(14) | -536(7)  | 2074(9)  | 70(4) |
| C(11) | 6963(14) | -269(9)  | 2153(10) | 77(5) |
| C(12) | 6642(10) | 534(9)   | 2324(9)  | 55(3) |
| C(13) | 6579(8)  | 1135(7)  | 4994(6)  | 28(2) |
| C(14) | 5638(11) | 881(9)   | 5067(9)  | 58(4) |
| C(15) | 5358(11) | 101(9)   | 5273(9)  | 62(4) |
| C(16) | 6012(13) | -475(9)  | 5309(10) | 81(5) |
| C(17) | 7143(13) | -313(8)  | 5248(9)  | 70(4) |
| C(18) | 7367(10) | 539(7)   | 5110(8)  | 50(3) |
| C(19) | 7043(8)  | 2574(6)  | 5816(6)  | 34(3) |
| C(20) | 6159(10) | 2629(9)  | 6242(7)  | 52(3) |
| C(21) | 6289(15) | 2821(10) | 6982(9)  | 87(6) |
| C(22) | 7262(13) | 2955(9)  | 7326(8)  | 67(5) |
| C(23) | 8045(12) | 2933(8)  | 6913(8)  | 53(4) |
| C(24) | 7940(10) | 2755(7)  | 6212(7)  | 41(3) |
| C(25) | 5870(7)  | 2351(6)  | 2885(6)  | 31(2) |
| C(26) | 5417(10) | 1801(8)  | 3427(6)  | 45(3) |



|        |           |          |          |        |
|--------|-----------|----------|----------|--------|
| C (27) | 4631 (9)  | 2207 (7) | 3719 (7) | 51 (3) |
| C (28) | 4568 (8)  | 3029 (8) | 3399 (8) | 54 (4) |
| C (29) | 5300 (9)  | 3148 (7) | 2895 (5) | 38 (3) |
| C (30) | 8522 (7)  | 1802 (5) | 3966 (6) | 26 (2) |
| C (31) | 9375 (7)  | 2232 (7) | 3650 (6) | 42 (3) |
| C (32) | 9469 (8)  | 3022 (8) | 3966 (5) | 38 (3) |
| C (33) | 8684 (8)  | 3106 (6) | 4478 (7) | 37 (3) |
| C (34) | 8132 (7)  | 2343 (6) | 4498 (6) | 29 (2) |
| C (35) | 8538 (12) | 5013 (9) | 3477 (9) | 75 (4) |
| C (36) | 9159 (12) | 4257 (9) | 2332 (8) | 69 (3) |
| C (37) | 7235 (12) | 4586 (8) | 2251 (8) | 66 (4) |
| C (38) | 6831 (12) | 4621 (6) | 5129 (7) | 62 (4) |
| C (39) | 5528 (13) | 5045 (8) | 3910 (8) | 80 (5) |
| C (40) | 4717 (12) | 4083 (9) | 5202 (9) | 73 (4) |

---

Table 3. Bond lengths [Å] and angles [deg] for Complex 3

---

|             |           |
|-------------|-----------|
| Co(1)–C(33) | 2.061(11) |
| Co(1)–C(30) | 2.092(9)  |
| Co(1)–C(34) | 2.109(10) |
| Co(1)–C(31) | 2.128(10) |
| Co(1)–C(32) | 2.127(11) |
| Co(1)–P(3)  | 2.164(3)  |
| Co(1)–P(5)  | 2.186(3)  |
| Co(1)–Fe(2) | 2.9319(9) |
| Fe(2)–C(28) | 2.043(10) |
| Fe(2)–C(29) | 2.073(10) |
| Fe(2)–C(26) | 2.087(12) |
| Fe(2)–C(27) | 2.090(10) |
| Fe(2)–C(25) | 2.102(10) |
| Fe(2)–P(4)  | 2.149(3)  |
| Fe(2)–P(6)  | 2.175(4)  |
| P(3)–C(25)  | 1.776(11) |
| P(3)–C(7)   | 1.834(13) |
| P(3)–C(1)   | 1.846(11) |
| P(4)–C(34)  | 1.825(10) |
| P(4)–C(19)  | 1.861(11) |
| P(4)–C(13)  | 1.864(11) |
| P(5)–C(36)  | 1.717(14) |
| P(5)–C(37)  | 1.756(14) |
| P(5)–C(35)  | 1.833(15) |
| P(6)–C(39)  | 1.858(12) |
| P(6)–C(38)  | 1.879(11) |
| P(6)–C(40)  | 1.960(14) |
| C(1)–C(6)   | 1.301(16) |
| C(1)–C(2)   | 1.414(15) |
| C(2)–C(3)   | 1.475(18) |
| C(2)–H(2)   | 0.9300    |
| C(3)–C(4)   | 1.42(2)   |
| C(3)–H(3)   | 0.9300    |
| C(4)–C(5)   | 1.32(2)   |
| C(4)–H(4)   | 0.9300    |
| C(5)–C(6)   | 1.440(19) |
| C(5)–H(5)   | 0.9300    |
| C(6)–H(6)   | 0.9300    |
| C(7)–C(12)  | 1.328(18) |

|               |             |
|---------------|-------------|
| C (7)–C (8)   | 1. 467 (18) |
| C (8)–C (9)   | 1. 416 (18) |
| C (8)–H (8)   | 0. 9300     |
| C (9)–C (10)  | 1. 43 (2)   |
| C (9)–H (9)   | 0. 9300     |
| C (10)–C (11) | 1. 20 (2)   |
| C (10)–H (10) | 0. 9300     |
| C (11)–C (12) | 1. 382 (19) |
| C (11)–H (11) | 0. 9300     |
| C (12)–H (12) | 0. 9300     |
| C (13)–C (14) | 1. 325 (18) |
| C (13)–C (18) | 1. 415 (15) |
| C (14)–C (15) | 1. 348 (19) |
| C (14)–H (14) | 0. 9300     |
| C (15)–C (16) | 1. 26 (2)   |
| C (15)–H (15) | 0. 9300     |
| C (16)–C (17) | 1. 53 (2)   |
| C (16)–H (16) | 0. 9300     |
| C (17)–C (18) | 1. 407 (15) |
| C (17)–H (17) | 0. 9300     |
| C (18)–H (18) | 0. 9300     |
| C (19)–C (24) | 1. 378 (16) |
| C (19)–C (20) | 1. 440 (13) |
| C (20)–C (21) | 1. 36 (2)   |
| C (20)–H (20) | 0. 9300     |
| C (21)–C (22) | 1. 41 (2)   |
| C (21)–H (21) | 0. 9300     |
| C (22)–C (23) | 1. 31 (2)   |
| C (22)–H (22) | 0. 9300     |
| C (23)–C (24) | 1. 287 (18) |
| C (23)–H (23) | 0. 9300     |
| C (24)–H (24) | 0. 9300     |
| C (25)–C (29) | 1. 472 (14) |
| C (25)–C (26) | 1. 461 (15) |
| C (26)–C (27) | 1. 356 (17) |
| C (26)–H (26) | 0. 9800     |
| C (27)–C (28) | 1. 424 (17) |
| C (27)–H (27) | 0. 9800     |
| C (28)–C (29) | 1. 377 (18) |
| C (28)–H (28) | 0. 9799     |
| C (29)–H (29) | 0. 9800     |
| C (30)–C (34) | 1. 403 (14) |
| C (30)–C (31) | 1. 463 (11) |
| C (30)–H (30) | 0. 9800     |

|                      |             |
|----------------------|-------------|
| C (31)–C (32)        | 1. 377 (16) |
| C (31)–H (31)        | 0. 9799     |
| C (32)–C (33)        | 1. 434 (16) |
| C (32)–H (32)        | 0. 9800     |
| C (33)–C (34)        | 1. 416 (11) |
| C (33)–H (33)        | 0. 9800     |
| C (35)–H (35A)       | 0. 9600     |
| C (35)–H (35B)       | 0. 9600     |
| C (35)–H (35C)       | 0. 9600     |
| C (36)–H (36A)       | 0. 9600     |
| C (36)–H (36B)       | 0. 9600     |
| C (36)–H (36C)       | 0. 9600     |
| C (37)–H (37A)       | 0. 9600     |
| C (37)–H (37B)       | 0. 9600     |
| C (37)–H (37C)       | 0. 9600     |
| C (38)–H (38A)       | 0. 9600     |
| C (38)–H (38B)       | 0. 9600     |
| C (38)–H (38C)       | 0. 9600     |
| C (39)–H (39A)       | 0. 9600     |
| C (39)–H (39B)       | 0. 9600     |
| C (39)–H (39C)       | 0. 9600     |
| C (40)–H (40A)       | 0. 9600     |
| C (40)–H (40B)       | 0. 9600     |
| C (40)–H (40C)       | 0. 9600     |
|                      |             |
| C (33)–Co (1)–C (30) | 66. 2 (4)   |
| C (33)–Co (1)–C (34) | 39. 7 (3)   |
| C (30)–Co (1)–C (34) | 39. 0 (4)   |
| C (33)–Co (1)–C (31) | 65. 4 (5)   |
| C (30)–Co (1)–C (31) | 40. 6 (3)   |
| C (34)–Co (1)–C (31) | 66. 2 (4)   |
| C (33)–Co (1)–C (32) | 40. 0 (4)   |
| C (30)–Co (1)–C (32) | 66. 3 (4)   |
| C (34)–Co (1)–C (32) | 66. 6 (4)   |
| C (31)–Co (1)–C (32) | 37. 8 (4)   |
| C (33)–Co (1)–P (3)  | 158. 4 (3)  |
| C (30)–Co (1)–P (3)  | 96. 0 (3)   |
| C (34)–Co (1)–P (3)  | 118. 7 (3)  |
| C (31)–Co (1)–P (3)  | 109. 6 (4)  |
| C (32)–Co (1)–P (3)  | 145. 2 (3)  |
| C (33)–Co (1)–P (5)  | 103. 5 (3)  |
| C (30)–Co (1)–P (5)  | 155. 9 (3)  |
| C (34)–Co (1)–P (5)  | 141. 5 (3)  |
| C (31)–Co (1)–P (5)  | 115. 6 (3)  |

|                      |             |
|----------------------|-------------|
| C (32)–Co (1)–P (5)  | 91.6 (3)    |
| P (3)–Co (1)–P (5)   | 97.52 (13)  |
| C (33)–Co (1)–Fe (2) | 94.3 (3)    |
| C (30)–Co (1)–Fe (2) | 98.0 (2)    |
| C (34)–Co (1)–Fe (2) | 74.8 (3)    |
| C (31)–Co (1)–Fe (2) | 137.8 (3)   |
| C (32)–Co (1)–Fe (2) | 134.3 (3)   |
| P (3)–Co (1)–Fe (2)  | 75.42 (9)   |
| P (5)–Co (1)–Fe (2)  | 104.71 (12) |
| C (28)–Fe (2)–C (29) | 39.1 (5)    |
| C (28)–Fe (2)–C (26) | 65.9 (5)    |
| C (29)–Fe (2)–C (26) | 68.4 (4)    |
| C (28)–Fe (2)–C (27) | 40.3 (5)    |
| C (29)–Fe (2)–C (27) | 67.5 (5)    |
| C (26)–Fe (2)–C (27) | 37.9 (5)    |
| C (28)–Fe (2)–C (25) | 66.5 (4)    |
| C (29)–Fe (2)–C (25) | 41.3 (4)    |
| C (26)–Fe (2)–C (25) | 40.8 (4)    |
| C (27)–Fe (2)–C (25) | 66.5 (4)    |
| C (28)–Fe (2)–P (4)  | 147.4 (4)   |
| C (29)–Fe (2)–P (4)  | 158.4 (3)   |
| C (26)–Fe (2)–P (4)  | 95.4 (3)    |
| C (27)–Fe (2)–P (4)  | 108.8 (4)   |
| C (25)–Fe (2)–P (4)  | 117.2 (3)   |
| C (28)–Fe (2)–P (6)  | 92.3 (4)    |
| C (29)–Fe (2)–P (6)  | 102.4 (4)   |
| C (26)–Fe (2)–P (6)  | 155.4 (4)   |
| C (27)–Fe (2)–P (6)  | 117.7 (4)   |
| C (25)–Fe (2)–P (6)  | 141.8 (3)   |
| P (4)–Fe (2)–P (6)   | 97.97 (13)  |
| C (28)–Fe (2)–Co (1) | 131.9 (4)   |
| C (29)–Fe (2)–Co (1) | 92.9 (3)    |
| C (26)–Fe (2)–Co (1) | 98.8 (4)    |
| C (27)–Fe (2)–Co (1) | 136.0 (4)   |
| C (25)–Fe (2)–Co (1) | 73.0 (3)    |
| P (4)–Fe (2)–Co (1)  | 75.00 (9)   |
| P (6)–Fe (2)–Co (1)  | 104.59 (13) |
| C (25)–P (3)–C (7)   | 105.7 (6)   |
| C (25)–P (3)–C (1)   | 105.0 (5)   |
| C (7)–P (3)–C (1)    | 96.8 (6)    |
| C (25)–P (3)–Co (1)  | 101.8 (3)   |
| C (7)–P (3)–Co (1)   | 118.4 (4)   |
| C (1)–P (3)–Co (1)   | 127.2 (4)   |
| C (34)–P (4)–C (19)  | 102.0 (5)   |

|                  |           |
|------------------|-----------|
| C(34)-P(4)-C(13) | 108.1(5)  |
| C(19)-P(4)-C(13) | 95.8(5)   |
| C(34)-P(4)-Fe(2) | 103.6(3)  |
| C(19)-P(4)-Fe(2) | 127.6(3)  |
| C(13)-P(4)-Fe(2) | 117.9(4)  |
| C(36)-P(5)-C(37) | 96.9(8)   |
| C(36)-P(5)-C(35) | 91.9(7)   |
| C(37)-P(5)-C(35) | 102.5(7)  |
| C(36)-P(5)-Co(1) | 117.3(5)  |
| C(37)-P(5)-Co(1) | 125.7(5)  |
| C(35)-P(5)-Co(1) | 116.1(5)  |
| C(39)-P(6)-C(38) | 96.5(6)   |
| C(39)-P(6)-C(40) | 104.7(7)  |
| C(38)-P(6)-C(40) | 100.0(8)  |
| C(39)-P(6)-Fe(2) | 116.9(5)  |
| C(38)-P(6)-Fe(2) | 124.9(4)  |
| C(40)-P(6)-Fe(2) | 110.9(5)  |
| C(6)-C(1)-C(2)   | 120.7(11) |
| C(6)-C(1)-P(3)   | 118.6(8)  |
| C(2)-C(1)-P(3)   | 120.2(9)  |
| C(1)-C(2)-C(3)   | 116.8(13) |
| C(1)-C(2)-H(2)   | 121.6     |
| C(3)-C(2)-H(2)   | 121.6     |
| C(4)-C(3)-C(2)   | 118.2(14) |
| C(4)-C(3)-H(3)   | 120.9     |
| C(2)-C(3)-H(3)   | 120.9     |
| C(5)-C(4)-C(3)   | 121.9(12) |
| C(5)-C(4)-H(4)   | 119.0     |
| C(3)-C(4)-H(4)   | 119.1     |
| C(4)-C(5)-C(6)   | 118.2(12) |
| C(4)-C(5)-H(5)   | 120.9     |
| C(6)-C(5)-H(5)   | 120.9     |
| C(1)-C(6)-C(5)   | 123.7(12) |
| C(1)-C(6)-H(6)   | 118.2     |
| C(5)-C(6)-H(6)   | 118.2     |
| C(12)-C(7)-C(8)  | 117.2(12) |
| C(12)-C(7)-P(3)  | 128.4(11) |
| C(8)-C(7)-P(3)   | 114.3(10) |
| C(9)-C(8)-C(7)   | 117.4(13) |
| C(9)-C(8)-H(8)   | 121.3     |
| C(7)-C(8)-H(8)   | 121.3     |
| C(10)-C(9)-C(8)  | 120.1(14) |
| C(10)-C(9)-H(9)  | 119.9     |
| C(8)-C(9)-H(9)   | 119.9     |

|                   |           |
|-------------------|-----------|
| C(11)-C(10)-C(9)  | 115.6(13) |
| C(11)-C(10)-H(10) | 122.2     |
| C(9)-C(10)-H(10)  | 122.2     |
| C(10)-C(11)-C(12) | 130.5(16) |
| C(10)-C(11)-H(11) | 114.8     |
| C(12)-C(11)-H(11) | 114.7     |
| C(7)-C(12)-C(11)  | 118.9(14) |
| C(7)-C(12)-H(12)  | 120.5     |
| C(11)-C(12)-H(12) | 120.5     |
| C(14)-C(13)-C(18) | 118.3(12) |
| C(14)-C(13)-P(4)  | 120.3(10) |
| C(18)-C(13)-P(4)  | 121.2(9)  |
| C(13)-C(14)-C(15) | 125.6(14) |
| C(13)-C(14)-H(14) | 117.2     |
| C(15)-C(14)-H(14) | 117.2     |
| C(16)-C(15)-C(14) | 118.6(14) |
| C(16)-C(15)-H(15) | 120.7     |
| C(14)-C(15)-H(15) | 120.7     |
| C(15)-C(16)-C(17) | 123.3(12) |
| C(15)-C(16)-H(16) | 118.3     |
| C(17)-C(16)-H(16) | 118.4     |
| C(18)-C(17)-C(16) | 113.0(12) |
| C(18)-C(17)-H(17) | 123.5     |
| C(16)-C(17)-H(17) | 123.5     |
| C(17)-C(18)-C(13) | 120.3(13) |
| C(17)-C(18)-H(18) | 119.8     |
| C(13)-C(18)-H(18) | 119.9     |
| C(24)-C(19)-C(20) | 114.8(11) |
| C(24)-C(19)-P(4)  | 127.9(8)  |
| C(20)-C(19)-P(4)  | 117.3(9)  |
| C(21)-C(20)-C(19) | 118.0(14) |
| C(21)-C(20)-H(20) | 121.0     |
| C(19)-C(20)-H(20) | 121.0     |
| C(20)-C(21)-C(22) | 121.2(14) |
| C(20)-C(21)-H(21) | 119.4     |
| C(22)-C(21)-H(21) | 119.4     |
| C(23)-C(22)-C(21) | 118.9(13) |
| C(23)-C(22)-H(22) | 120.5     |
| C(21)-C(22)-H(22) | 120.5     |
| C(24)-C(23)-C(22) | 120.9(14) |
| C(24)-C(23)-H(23) | 119.6     |
| C(22)-C(23)-H(23) | 119.6     |
| C(23)-C(24)-C(19) | 126.0(14) |
| C(23)-C(24)-H(24) | 117.0     |

|                      |            |
|----------------------|------------|
| C (19)–C (24)–H (24) | 117.0      |
| C (29)–C (25)–C (26) | 105.8 (10) |
| C (29)–C (25)–P (3)  | 122.8 (8)  |
| C (26)–C (25)–P (3)  | 127.5 (9)  |
| C (29)–C (25)–Fe (2) | 68.3 (5)   |
| C (26)–C (25)–Fe (2) | 69.0 (6)   |
| P (3)–C (25)–Fe (2)  | 109.7 (4)  |
| C (27)–C (26)–C (25) | 109.2 (11) |
| C (27)–C (26)–Fe (2) | 71.2 (7)   |
| C (25)–C (26)–Fe (2) | 70.1 (6)   |
| C (27)–C (26)–H (26) | 125.4      |
| C (25)–C (26)–H (26) | 125.4      |
| Fe (2)–C (26)–H (26) | 125.4      |
| C (26)–C (27)–C (28) | 107.8 (11) |
| C (26)–C (27)–Fe (2) | 70.9 (7)   |
| C (28)–C (27)–Fe (2) | 68.1 (6)   |
| C (26)–C (27)–H (27) | 126.2      |
| C (28)–C (27)–H (27) | 126.0      |
| Fe (2)–C (27)–H (27) | 126.1      |
| C (29)–C (28)–C (27) | 111.3 (11) |
| C (29)–C (28)–Fe (2) | 71.6 (6)   |
| C (27)–C (28)–Fe (2) | 71.7 (7)   |
| C (29)–C (28)–H (28) | 124.4      |
| C (27)–C (28)–H (28) | 124.4      |
| Fe (2)–C (28)–H (28) | 124.3      |
| C (28)–C (29)–C (25) | 105.9 (10) |
| C (28)–C (29)–Fe (2) | 69.3 (6)   |
| C (25)–C (29)–Fe (2) | 70.4 (5)   |
| C (28)–C (29)–H (29) | 127.0      |
| C (25)–C (29)–H (29) | 127.1      |
| Fe (2)–C (29)–H (29) | 127.1      |
| C (34)–C (30)–C (31) | 107.6 (8)  |
| C (34)–C (30)–Co (1) | 71.1 (5)   |
| C (31)–C (30)–Co (1) | 71.0 (5)   |
| C (34)–C (30)–H (30) | 126.2      |
| C (31)–C (30)–H (30) | 126.1      |
| Co (1)–C (30)–H (30) | 126.2      |
| C (32)–C (31)–C (30) | 108.5 (10) |
| C (32)–C (31)–Co (1) | 71.1 (7)   |
| C (30)–C (31)–Co (1) | 68.4 (5)   |
| C (32)–C (31)–H (31) | 125.7      |
| C (30)–C (31)–H (31) | 125.7      |
| Co (1)–C (31)–H (31) | 125.7      |
| C (31)–C (32)–C (33) | 107.2 (10) |



|                        |            |
|------------------------|------------|
| C (31)–C (32)–Co (1)   | 71.1 (6)   |
| C (33)–C (32)–Co (1)   | 67.5 (6)   |
| C (31)–C (32)–H (32)   | 126.4      |
| C (33)–C (32)–H (32)   | 126.4      |
| Co (1)–C (32)–H (32)   | 126.4      |
| C (34)–C (33)–C (32)   | 109.5 (10) |
| C (34)–C (33)–Co (1)   | 72.0 (6)   |
| C (32)–C (33)–Co (1)   | 72.5 (7)   |
| C (34)–C (33)–H (33)   | 125.2      |
| C (32)–C (33)–H (33)   | 125.3      |
| Co (1)–C (33)–H (33)   | 125.1      |
| C (30)–C (34)–C (33)   | 107.0 (9)  |
| C (30)–C (34)–P (4)    | 124.0 (7)  |
| C (33)–C (34)–P (4)    | 123.7 (8)  |
| C (30)–C (34)–Co (1)   | 69.9 (6)   |
| C (33)–C (34)–Co (1)   | 68.3 (6)   |
| P (4)–C (34)–Co (1)    | 106.4 (5)  |
| P (5)–C (35)–H (35A)   | 109.5      |
| P (5)–C (35)–H (35B)   | 109.5      |
| H (35A)–C (35)–H (35B) | 109.5      |
| P (5)–C (35)–H (35C)   | 109.5      |
| H (35A)–C (35)–H (35C) | 109.5      |
| H (35B)–C (35)–H (35C) | 109.5      |
| P (5)–C (36)–H (36A)   | 109.5      |
| P (5)–C (36)–H (36B)   | 109.5      |
| H (36A)–C (36)–H (36B) | 109.5      |
| P (5)–C (36)–H (36C)   | 109.5      |
| H (36A)–C (36)–H (36C) | 109.5      |
| H (36B)–C (36)–H (36C) | 109.5      |
| P (5)–C (37)–H (37A)   | 109.5      |
| P (5)–C (37)–H (37B)   | 109.5      |
| H (37A)–C (37)–H (37B) | 109.5      |
| P (5)–C (37)–H (37C)   | 109.5      |
| H (37A)–C (37)–H (37C) | 109.5      |
| H (37B)–C (37)–H (37C) | 109.5      |
| P (6)–C (38)–H (38A)   | 109.5      |
| P (6)–C (38)–H (38B)   | 109.5      |
| H (38A)–C (38)–H (38B) | 109.5      |
| P (6)–C (38)–H (38C)   | 109.5      |
| H (38A)–C (38)–H (38C) | 109.5      |
| H (38B)–C (38)–H (38C) | 109.5      |
| P (6)–C (39)–H (39A)   | 109.5      |
| P (6)–C (39)–H (39B)   | 109.5      |
| H (39A)–C (39)–H (39B) | 109.5      |

|                          |       |
|--------------------------|-------|
| P (6) -C (39) -H (39C)   | 109.5 |
| H (39A) -C (39) -H (39C) | 109.5 |
| H (39B) -C (39) -H (39C) | 109.5 |
| P (6) -C (40) -H (40A)   | 109.5 |
| P (6) -C (40) -H (40B)   | 109.5 |
| H (40A) -C (40) -H (40B) | 109.5 |
| P (6) -C (40) -H (40C)   | 109.5 |
| H (40A) -C (40) -H (40C) | 109.5 |
| H (40B) -C (40) -H (40C) | 109.5 |

---

Symmetry transformations used to generate equivalent atoms:

Table 4. Anisotropic displacement parameters ( $\text{Å}^2 \times 10^3$ ) for Complex 3

The anisotropic displacement factor exponent takes the form:

$$-2 \pi^2 [ h^2 a^{*2} U_{11} + \dots + 2 h k a^* b^* U_{12} ]$$

|       | U11     | U22     | U33    | U23    | U13    | U12    |
|-------|---------|---------|--------|--------|--------|--------|
| Co(1) | 36(1)   | 31(1)   | 31(1)  | 6(1)   | -2(1)  | -3(1)  |
| Fe(2) | 26(1)   | 32(1)   | 30(1)  | -3(1)  | -6(1)  | 6(1)   |
| P(3)  | 31(1)   | 28(1)   | 28(2)  | 1(1)   | 0(1)   | -1(1)  |
| P(4)  | 30(1)   | 26(1)   | 24(1)  | -1(1)  | 0(1)   | 1(1)   |
| P(5)  | 54(2)   | 37(2)   | 42(2)  | 15(1)  | -12(2) | -21(2) |
| P(6)  | 61(2)   | 37(2)   | 46(2)  | -9(1)  | -10(2) | 16(2)  |
| C(1)  | 43(6)   | 41(6)   | 23(5)  | -6(4)  | -16(4) | 3(5)   |
| C(2)  | 44(6)   | 53(6)   | 19(4)  | 0(4)   | -12(4) | -13(5) |
| C(3)  | 88(10)  | 48(7)   | 43(7)  | 24(5)  | -12(7) | -24(6) |
| C(4)  | 117(12) | 65(8)   | 25(6)  | 3(5)   | 32(7)  | -4(7)  |
| C(5)  | 65(8)   | 90(9)   | 53(9)  | 32(7)  | 17(6)  | -29(7) |
| C(6)  | 59(7)   | 68(8)   | 44(7)  | 7(6)   | -21(6) | -7(6)  |
| C(7)  | 50(6)   | 40(6)   | 38(7)  | -1(5)  | -6(5)  | 11(5)  |
| C(8)  | 40(6)   | 43(6)   | 45(7)  | -9(5)  | 6(5)   | 16(5)  |
| C(9)  | 91(10)  | 73(9)   | 45(7)  | -15(6) | -35(7) | 46(8)  |
| C(10) | 111(11) | 23(5)   | 74(9)  | 2(5)   | -7(8)  | -5(6)  |
| C(11) | 85(9)   | 51(8)   | 92(11) | -5(7)  | -14(8) | -12(7) |
| C(12) | 48(7)   | 60(8)   | 57(8)  | -9(6)  | 10(6)  | 4(6)   |
| C(13) | 37(5)   | 26(5)   | 21(5)  | 1(4)   | 4(4)   | 2(4)   |
| C(14) | 52(7)   | 61(8)   | 59(9)  | 8(6)   | -7(6)  | -2(6)  |
| C(15) | 60(8)   | 53(7)   | 75(9)  | 18(6)  | 9(6)   | -15(6) |
| C(16) | 103(11) | 60(8)   | 80(11) | 27(7)  | 6(8)   | -48(8) |
| C(17) | 83(8)   | 37(6)   | 95(10) | 34(6)  | 38(7)  | 22(5)  |
| C(18) | 66(8)   | 27(5)   | 58(7)  | 20(5)  | 20(6)  | 19(5)  |
| C(19) | 47(6)   | 23(5)   | 34(5)  | -4(4)  | 24(5)  | 12(4)  |
| C(20) | 52(6)   | 64(7)   | 46(6)  | -13(5) | 39(5)  | 2(5)   |
| C(21) | 116(14) | 103(11) | 47(9)  | -2(7)  | 39(9)  | -30(9) |
| C(22) | 97(10)  | 61(8)   | 39(7)  | -20(5) | -30(7) | 23(7)  |
| C(23) | 68(8)   | 55(7)   | 33(6)  | 9(5)   | -18(6) | -18(6) |
| C(24) | 54(7)   | 28(5)   | 43(7)  | 1(4)   | 6(5)   | 9(4)   |
| C(25) | 26(4)   | 41(5)   | 24(5)  | -1(4)  | -11(4) | -20(4) |
| C(26) | 57(7)   | 54(7)   | 21(5)  | 4(5)   | -8(5)  | -18(6) |
| C(27) | 55(7)   | 63(7)   | 35(6)  | 1(5)   | -4(5)  | -40(5) |

|       |         |       |        |        |        |        |
|-------|---------|-------|--------|--------|--------|--------|
| C(28) | 21(5)   | 57(7) | 82(9)  | -27(6) | -23(5) | 22(4)  |
| C(29) | 40(6)   | 57(6) | 15(4)  | 6(4)   | -10(4) | -7(5)  |
| C(30) | 18(4)   | 20(4) | 40(5)  | 14(4)  | 15(4)  | 1(3)   |
| C(31) | 17(4)   | 71(7) | 38(6)  | 23(5)  | 1(4)   | -17(4) |
| C(32) | 36(5)   | 63(7) | 16(4)  | 7(4)   | 0(3)   | 0(4)   |
| C(33) | 33(5)   | 25(4) | 53(7)  | 10(4)  | -9(5)  | -18(4) |
| C(34) | 30(4)   | 24(4) | 35(6)  | 3(4)   | 8(4)   | -16(3) |
| C(35) | 86(9)   | 51(8) | 87(11) | 19(7)  | 0(7)   | -27(7) |
| C(36) | 74(7)   | 70(7) | 63(7)  | 10(6)  | 21(6)  | -10(5) |
| C(37) | 78(8)   | 56(7) | 63(8)  | -5(6)  | -1(7)  | -20(6) |
| C(38) | 93(9)   | 24(5) | 62(8)  | -25(5) | -51(7) | 8(5)   |
| C(39) | 126(12) | 34(6) | 70(9)  | -5(5)  | -67(8) | 31(6)  |
| C(40) | 79(8)   | 71(7) | 72(8)  | -1(5)  | 35(6)  | 33(6)  |

---

Table 5. Hydrogen coordinates ( $\times 10^4$ ) and isotropic displacement parameters ( $\text{\AA}^2 \times 10^3$ ) for Complex 3

|        | x    | y     | z    | U(eq) |
|--------|------|-------|------|-------|
| H(2)   | 5398 | 2685  | 1485 | 47    |
| H(3)   | 5299 | 3060  | 163  | 72    |
| H(4)   | 6811 | 3162  | -455 | 81    |
| H(5)   | 8286 | 2742  | 107  | 83    |
| H(6)   | 8357 | 2435  | 1396 | 70    |
| H(8)   | 8876 | 1342  | 2297 | 51    |
| H(9)   | 9264 | -100  | 2132 | 85    |
| H(10)  | 7916 | -1100 | 1965 | 84    |
| H(11)  | 6450 | -667  | 2089 | 92    |
| H(12)  | 5964 | 639   | 2393 | 66    |
| H(14)  | 5128 | 1274  | 4966 | 69    |
| H(15)  | 4695 | -8    | 5387 | 75    |
| H(16)  | 5798 | -1028 | 5376 | 97    |
| H(17)  | 7631 | -733  | 5297 | 84    |
| H(18)  | 8035 | 711   | 5096 | 60    |
| H(20)  | 5518 | 2536  | 6019 | 63    |
| H(21)  | 5727 | 2866  | 7267 | 105   |
| H(22)  | 7346 | 3057  | 7837 | 80    |
| H(23)  | 8685 | 3047  | 7129 | 64    |
| H(24)  | 8522 | 2749  | 5948 | 49    |
| H(26)  | 5642 | 1228  | 3556 | 53    |
| H(27)  | 4187 | 1978  | 4087 | 61    |
| H(28)  | 4066 | 3454  | 3519 | 65    |
| H(29)  | 5399 | 3650  | 2588 | 45    |
| H(30)  | 8291 | 1227  | 3850 | 31    |
| H(31)  | 9801 | 1999  | 3272 | 50    |
| H(32)  | 9977 | 3448  | 3860 | 46    |
| H(33)  | 8577 | 3601  | 4791 | 45    |
| H(35A) | 8627 | 5506  | 3175 | 112   |
| H(35B) | 9164 | 4878  | 3746 | 112   |
| H(35C) | 8030 | 5122  | 3824 | 112   |
| H(36A) | 9145 | 3832  | 1951 | 103   |
| H(36B) | 9773 | 4210  | 2639 | 103   |
| H(36C) | 9124 | 4805  | 2103 | 103   |

|        |      |      |      |     |
|--------|------|------|------|-----|
| H(37A) | 7520 | 5072 | 2022 | 99  |
| H(37B) | 6662 | 4754 | 2518 | 99  |
| H(37C) | 7026 | 4184 | 1872 | 99  |
| H(38A) | 7465 | 4574 | 4900 | 93  |
| H(38B) | 6878 | 4344 | 5606 | 93  |
| H(38C) | 6673 | 5206 | 5197 | 93  |
| H(39A) | 5251 | 5487 | 4202 | 119 |
| H(39B) | 5049 | 4891 | 3511 | 119 |
| H(39C) | 6139 | 5240 | 3705 | 119 |
| H(40A) | 4578 | 4646 | 5365 | 109 |
| H(40B) | 4916 | 3740 | 5627 | 109 |
| H(40C) | 4121 | 3849 | 4951 | 109 |

---

Table 6. Torsion angles [deg] for Complex 3

Complex 8

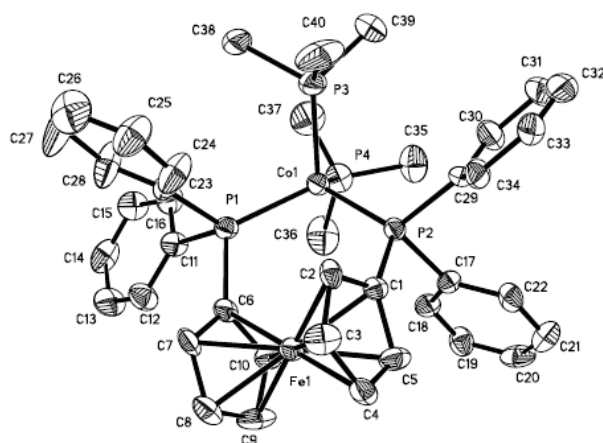

Table 1. Crystal data and structure refinement for Complex 8.

|                             |                           |                        |
|-----------------------------|---------------------------|------------------------|
| Identification code         | test1                     |                        |
| Empirical formula           | C40 H46 Co Fe P4          |                        |
| Formula weight              | 765.43                    |                        |
| Temperature                 | 298(2) K                  |                        |
| Wavelength                  | 0.71073 Å                 |                        |
| Crystal system, space group | Triclinic, P-1            |                        |
| Unit cell dimensions        | a = 10.524(3) Å           | alpha = 69.857(6) deg. |
|                             | b = 18.946(6) Å           | beta = 87.349(6) deg.  |
|                             | c = 20.071(6) Å           | gamma = 87.141(6) deg. |
| Volume                      | 3750.7(19) Å <sup>3</sup> |                        |

|                                   |                                             |
|-----------------------------------|---------------------------------------------|
| Z, Calculated density             | 2, 1.355 Mg/m <sup>3</sup>                  |
| Absorption coefficient            | 1.027 mm <sup>-1</sup>                      |
| F(000)                            | 1596.0                                      |
| Crystal size                      | 0.36 x 0.32 x 0.28 mm                       |
| Theta range for data collection   | 1.08 to 24.00 deg.                          |
| Limiting indices                  | -11<=h<=12, -20<=k<=21, -21<=l<=22          |
| Reflections collected / unique    | 17348 / 11701 [R(int) = 0.0646]             |
| Completeness to theta = 24.00     | 99.4 %                                      |
| Absorption correction             | None                                        |
| Refinement method                 | Full-matrix least-squares on F <sup>2</sup> |
| Data / restraints / parameters    | 11701 / 0 / 841                             |
| Goodness-of-fit on F <sup>2</sup> | 0.999                                       |
| Final R indices [I>2sigma(I)]     | R1 = 0.0692, wR2 = 0.1623                   |
| R indices (all data)              | R1 = 0.1587, wR2 = 0.2498                   |
| Largest diff. peak and hole       | 0.567 and -0.589 e.Å <sup>-3</sup>          |



Table 2. Atomic coordinates ( $\times 10^4$ ) and equivalent isotropic displacement parameters ( $\text{\AA}^2 \times 10^3$ ) for Complex 8.

$U(\text{eq})$  is defined as one third of the trace of the orthogonalized  $U_{ij}$  tensor.

|       | x         | y        | z        | $U(\text{eq})$ |
|-------|-----------|----------|----------|----------------|
| C(1)  | 1699(9)   | 602(5)   | 3745(5)  | 38(2)          |
| C(2)  | 2727(9)   | 113(5)   | 3675(5)  | 42(2)          |
| C(3)  | 3586(11)  | 25(6)    | 4231(6)  | 59(3)          |
| C(4)  | 3098(10)  | 454(6)   | 4637(5)  | 54(3)          |
| C(5)  | 1943(11)  | 808(6)   | 4345(5)  | 54(3)          |
| C(6)  | 3671(10)  | 1798(5)  | 2572(5)  | 44(3)          |
| C(7)  | 4830(9)   | 1486(6)  | 2861(6)  | 51(3)          |
| C(8)  | 5053(10)  | 1693(6)  | 3449(6)  | 60(3)          |
| C(9)  | 4006(14)  | 2155(6)  | 3532(6)  | 71(4)          |
| C(10) | 3113(10)  | 2231(5)  | 2997(5)  | 47(3)          |
| C(11) | 3328(10)  | 2674(5)  | 1150(5)  | 49(3)          |
| C(12) | 4207(11)  | 3123(6)  | 1263(6)  | 66(3)          |
| C(13) | 4524(13)  | 3794(6)  | 740(7)   | 79(4)          |
| C(14) | 3994(14)  | 4003(7)  | 92(7)    | 76(4)          |
| C(15) | 3121(12)  | 3567(7)  | -36(7)   | 72(4)          |
| C(16) | 2747(11)  | 2925(6)  | 497(6)   | 65(3)          |
| C(17) | -532(9)   | 1492(5)  | 3591(5)  | 40(2)          |
| C(18) | -556(10)  | 2271(6)  | 3312(6)  | 52(3)          |
| C(19) | -1188(10) | 2716(6)  | 3630(7)  | 60(3)          |
| C(20) | -1834(12) | 2401(7)  | 4230(7)  | 69(4)          |
| C(21) | -1858(11) | 1626(7)  | 4543(6)  | 66(3)          |
| C(22) | -1207(9)  | 1176(6)  | 4209(6)  | 52(3)          |
| C(23) | 3970(9)   | 1131(6)  | 1512(5)  | 42(2)          |
| C(24) | 4141(13)  | 394(7)   | 1904(7)  | 83(4)          |
| C(25) | 4850(15)  | -128(7)  | 1728(8)  | 90(5)          |
| C(26) | 5483(14)  | 91(8)    | 1095(10) | 101(5)         |
| C(27) | 5351(18)  | 817(9)   | 667(9)   | 144(8)         |
| C(28) | 4593(13)  | 1327(7)  | 896(8)   | 98(5)          |
| C(29) | -627(9)   | 108(5)   | 3414(5)  | 42(2)          |
| C(30) | -1765(11) | 170(7)   | 3135(6)  | 64(3)          |
| C(31) | -2559(13) | -440(10) | 3326(7)  | 95(5)          |
| C(32) | -2127(17) | -1125(8) | 3793(8)  | 85(5)          |
| C(33) | -995(12)  | -1199(7) | 4058(6)  | 61(3)          |

|        |            |          |          |         |
|--------|------------|----------|----------|---------|
| C (34) | -221 (11)  | -589 (5) | 3861 (5) | 52 (3)  |
| C (35) | -2171 (10) | 2355 (7) | 1749 (7) | 87 (4)  |
| C (36) | -282 (13)  | 3391 (6) | 1423 (8) | 101 (5) |
| C (37) | -838 (14)  | 2656 (8) | 500 (6)  | 98 (5)  |
| C (38) | 1272 (12)  | 808 (8)  | 596 (6)  | 87 (4)  |
| C (39) | -1208 (12) | 536 (8)  | 1266 (7) | 96 (5)  |
| C (40) | 960 (17)   | -327 (6) | 1907 (7) | 116 (6) |
| C (41) | 4491 (8)   | 4899 (5) | 2465 (5) | 38 (2)  |
| C (42) | 5426 (10)  | 5235 (6) | 1952 (5) | 50 (3)  |
| C (43) | 6484 (11)  | 4690 (7) | 2002 (6) | 65 (3)  |
| C (44) | 6105 (11)  | 4020 (6) | 2550 (6) | 60 (3)  |
| C (45) | 4920 (9)   | 4129 (5) | 2843 (6) | 49 (3)  |
| C (46) | 6118 (9)   | 5776 (5) | 3316 (5) | 39 (2)  |
| C (47) | 7421 (9)   | 5635 (5) | 3068 (6) | 47 (3)  |
| C (48) | 7834 (11)  | 4889 (6) | 3469 (6) | 61 (3)  |
| C (49) | 6771 (11)  | 4560 (6) | 3969 (6) | 61 (3)  |
| C (50) | 5746 (10)  | 5104 (5) | 3859 (5) | 48 (3)  |
| C (51) | 5087 (9)   | 7044 (5) | 3650 (5) | 39 (2)  |
| C (52) | 5483 (10)  | 6670 (6) | 4344 (5) | 54 (3)  |
| C (53) | 5382 (11)  | 7013 (7) | 4864 (6) | 66 (3)  |
| C (54) | 4879 (10)  | 7735 (8) | 4686 (7) | 65 (4)  |
| C (55) | 4481 (10)  | 8109 (6) | 4017 (6) | 60 (3)  |
| C (56) | 4604 (9)   | 7767 (5) | 3515 (6) | 47 (3)  |
| C (57) | 6287 (9)   | 7252 (5) | 2352 (5) | 40 (2)  |
| C (58) | 7086 (10)  | 7704 (6) | 2539 (6) | 60 (3)  |
| C (59) | 7904 (10)  | 8208 (6) | 2056 (6) | 61 (3)  |
| C (60) | 7982 (11)  | 8240 (7) | 1383 (7) | 64 (3)  |
| C (61) | 7273 (13)  | 7784 (7) | 1165 (6) | 81 (4)  |
| C (62) | 6428 (11)  | 7298 (6) | 1644 (6) | 63 (3)  |
| C (63) | 2390 (9)   | 4662 (6) | 3421 (5) | 45 (3)  |
| C (64) | 2310 (9)   | 4779 (6) | 4074 (6) | 54 (3)  |
| C (65) | 1747 (13)  | 4240 (8) | 4688 (6) | 84 (4)  |
| C (66) | 1329 (13)  | 3578 (7) | 4660 (8) | 83 (4)  |
| C (67) | 1446 (12)  | 3452 (7) | 4025 (8) | 78 (4)  |
| C (68) | 1984 (10)  | 3982 (6) | 3405 (7) | 63 (3)  |
| C (69) | 1992 (9)   | 5320 (5) | 1953 (5) | 41 (2)  |
| C (70) | 679 (12)   | 5517 (7) | 1998 (7) | 77 (4)  |
| C (71) | -164 (12)  | 5545 (7) | 1466 (7) | 76 (4)  |
| C (72) | 334 (15)   | 5359 (7) | 903 (7)  | 84 (4)  |
| C (73) | 1612 (12)  | 5158 (8) | 857 (7)  | 82 (4)  |
| C (74) | 2377 (11)  | 5145 (7) | 1375 (6) | 67 (3)  |
| C (75) | 137 (9)    | 6482 (7) | 3350 (6) | 62 (3)  |
| C (76) | 1958 (11)  | 6635 (6) | 4283 (5) | 66 (3)  |
| C (77) | 1307 (12)  | 7859 (6) | 3103 (7) | 76 (4)  |

|        |           |          |          |        |
|--------|-----------|----------|----------|--------|
| C (78) | 3389 (13) | 8306 (5) | 1347 (6) | 78 (4) |
| C (79) | 3518 (11) | 7164 (7) | 738 (5)  | 67 (3) |
| C (80) | 1250 (12) | 7554 (8) | 1283 (7) | 88 (4) |
| Co (1) | 802 (1)   | 1494 (1) | 1982 (1) | 40 (1) |
| Co (2) | 3195 (1)  | 6547 (1) | 2621 (1) | 38 (1) |
| Fe (1) | 3378 (1)  | 1131 (1) | 3603 (1) | 41 (1) |
| Fe (2) | 6155 (1)  | 4889 (1) | 2945 (1) | 42 (1) |
| P (1)  | 2811 (3)  | 1762 (2) | 1804 (1) | 42 (1) |
| P (2)  | 382 (2)   | 942 (1)  | 3115 (1) | 37 (1) |
| P (3)  | 462 (3)   | 667 (2)  | 1470 (2) | 59 (1) |
| P (4)  | -526 (3)  | 2436 (2) | 1452 (2) | 60 (1) |
| P (5)  | 5102 (2)  | 6625 (1) | 2959 (1) | 35 (1) |
| P (6)  | 3043 (2)  | 5403 (1) | 2638 (1) | 40 (1) |
| P (7)  | 2856 (3)  | 7331 (2) | 1543 (2) | 51 (1) |
| P (8)  | 1754 (3)  | 6849 (2) | 3325 (2) | 47 (1) |

---

Table 3. Bond lengths [Å] and angles [deg] for Complex 8.

---

|             |           |
|-------------|-----------|
| C(1)–C(5)   | 1.424(13) |
| C(1)–C(2)   | 1.422(12) |
| C(1)–P(2)   | 1.857(10) |
| C(1)–Fe(1)  | 2.035(9)  |
| C(2)–C(3)   | 1.428(14) |
| C(2)–Fe(1)  | 2.036(9)  |
| C(3)–C(4)   | 1.401(14) |
| C(3)–Fe(1)  | 2.047(10) |
| C(4)–C(5)   | 1.408(14) |
| C(4)–Fe(1)  | 2.046(10) |
| C(5)–Fe(1)  | 2.032(11) |
| C(6)–C(7)   | 1.388(13) |
| C(6)–C(10)  | 1.462(13) |
| C(6)–P(1)   | 1.847(10) |
| C(6)–Fe(1)  | 2.037(9)  |
| C(7)–C(8)   | 1.397(14) |
| C(7)–Fe(1)  | 2.051(10) |
| C(8)–C(9)   | 1.413(16) |
| C(8)–Fe(1)  | 2.060(10) |
| C(9)–C(10)  | 1.424(14) |
| C(9)–Fe(1)  | 2.036(10) |
| C(10)–Fe(1) | 2.032(10) |
| C(11)–C(12) | 1.365(13) |
| C(11)–C(16) | 1.390(14) |
| C(11)–P(1)  | 1.863(10) |
| C(12)–C(13) | 1.386(14) |
| C(13)–C(14) | 1.360(17) |
| C(14)–C(15) | 1.355(16) |
| C(15)–C(16) | 1.376(14) |
| C(17)–C(22) | 1.361(13) |
| C(17)–C(18) | 1.386(13) |
| C(17)–P(2)  | 1.851(9)  |
| C(18)–C(19) | 1.356(13) |
| C(19)–C(20) | 1.317(15) |
| C(20)–C(21) | 1.386(15) |
| C(21)–C(22) | 1.392(14) |
| C(23)–C(28) | 1.314(14) |
| C(23)–C(24) | 1.355(14) |
| C(23)–P(1)  | 1.878(10) |
| C(24)–C(25) | 1.342(15) |

|               |             |
|---------------|-------------|
| C (25)–C (26) | 1. 349 (17) |
| C (26)–C (27) | 1. 352 (18) |
| C (27)–C (28) | 1. 407 (17) |
| C (29)–C (30) | 1. 328 (14) |
| C (29)–C (34) | 1. 376 (13) |
| C (29)–P (2)  | 1. 855 (9)  |
| C (30)–C (31) | 1. 393 (15) |
| C (31)–C (32) | 1. 384 (19) |
| C (32)–C (33) | 1. 309 (18) |
| C (33)–C (34) | 1. 380 (13) |
| C (35)–P (4)  | 1. 801 (11) |
| C (36)–P (4)  | 1. 822 (12) |
| C (37)–P (4)  | 1. 853 (13) |
| C (38)–P (3)  | 1. 853 (11) |
| C (39)–P (3)  | 1. 870 (12) |
| C (40)–P (3)  | 1. 843 (13) |
| C (41)–C (42) | 1. 397 (12) |
| C (41)–C (45) | 1. 452 (13) |
| C (41)–P (6)  | 1. 842 (9)  |
| C (41)–Fe (2) | 2. 034 (9)  |
| C (42)–C (43) | 1. 464 (14) |
| C (42)–Fe (2) | 2. 045 (11) |
| C (43)–C (44) | 1. 425 (15) |
| C (43)–Fe (2) | 2. 066 (11) |
| C (44)–C (45) | 1. 391 (14) |
| C (44)–Fe (2) | 2. 061 (10) |
| C (45)–Fe (2) | 2. 053 (9)  |
| C (46)–C (50) | 1. 420 (13) |
| C (46)–C (47) | 1. 480 (13) |
| C (46)–P (5)  | 1. 830 (10) |
| C (46)–Fe (2) | 2. 057 (9)  |
| C (47)–C (48) | 1. 422 (14) |
| C (47)–Fe (2) | 2. 071 (9)  |
| C (48)–C (49) | 1. 478 (15) |
| C (48)–Fe (2) | 2. 097 (11) |
| C (49)–C (50) | 1. 424 (14) |
| C (49)–Fe (2) | 2. 057 (11) |
| C (50)–Fe (2) | 2. 034 (10) |
| C (51)–C (56) | 1. 376 (13) |
| C (51)–C (52) | 1. 400 (13) |
| C (51)–P (5)  | 1. 821 (9)  |
| C (52)–C (53) | 1. 405 (14) |
| C (53)–C (54) | 1. 374 (15) |
| C (54)–C (55) | 1. 359 (15) |

|                    |             |
|--------------------|-------------|
| C (55)–C (56)      | 1. 372 (13) |
| C (57)–C (58)      | 1. 378 (13) |
| C (57)–C (62)      | 1. 395 (13) |
| C (57)–P (5)       | 1. 861 (9)  |
| C (58)–C (59)      | 1. 400 (13) |
| C (59)–C (60)      | 1. 329 (15) |
| C (60)–C (61)      | 1. 361 (16) |
| C (61)–C (62)      | 1. 398 (14) |
| C (63)–C (68)      | 1. 388 (13) |
| C (63)–C (64)      | 1. 401 (14) |
| C (63)–P (6)       | 1. 841 (10) |
| C (64)–C (65)      | 1. 427 (15) |
| C (65)–C (66)      | 1. 370 (17) |
| C (66)–C (67)      | 1. 374 (17) |
| C (67)–C (68)      | 1. 416 (15) |
| C (69)–C (74)      | 1. 351 (13) |
| C (69)–C (70)      | 1. 421 (14) |
| C (69)–P (6)       | 1. 856 (10) |
| C (70)–C (71)      | 1. 405 (15) |
| C (71)–C (72)      | 1. 370 (17) |
| C (72)–C (73)      | 1. 388 (17) |
| C (73)–C (74)      | 1. 337 (15) |
| C (75)–P (8)       | 1. 862 (10) |
| C (76)–P (8)       | 1. 845 (10) |
| C (77)–P (8)       | 1. 851 (10) |
| C (78)–P (7)       | 1. 863 (10) |
| C (79)–P (7)       | 1. 850 (10) |
| C (80)–P (7)       | 1. 779 (12) |
| Co (1)–P (2)       | 2. 184 (3)  |
| Co (1)–P (1)       | 2. 184 (3)  |
| Co (1)–P (3)       | 2. 199 (3)  |
| Co (1)–P (4)       | 2. 203 (3)  |
| Co (2)–P (6)       | 2. 170 (3)  |
| Co (2)–P (5)       | 2. 176 (3)  |
| Co (2)–P (7)       | 2. 197 (3)  |
| Co (2)–P (8)       | 2. 211 (3)  |
| C (5)–C (1)–C (2)  | 106. 8 (9)  |
| C (5)–C (1)–P (2)  | 128. 4 (8)  |
| C (2)–C (1)–P (2)  | 124. 7 (7)  |
| C (5)–C (1)–Fe (1) | 69. 4 (6)   |
| C (2)–C (1)–Fe (1) | 69. 6 (5)   |
| P (2)–C (1)–Fe (1) | 122. 7 (4)  |
| C (1)–C (2)–C (3)  | 108. 0 (9)  |

|                   |           |
|-------------------|-----------|
| C(1)–C(2)–Fe(1)   | 69.5(5)   |
| C(3)–C(2)–Fe(1)   | 69.9(6)   |
| C(4)–C(3)–C(2)    | 108.1(10) |
| C(4)–C(3)–Fe(1)   | 70.0(6)   |
| C(2)–C(3)–Fe(1)   | 69.1(5)   |
| C(3)–C(4)–C(5)    | 108.2(9)  |
| C(3)–C(4)–Fe(1)   | 70.0(6)   |
| C(5)–C(4)–Fe(1)   | 69.2(6)   |
| C(4)–C(5)–C(1)    | 108.8(10) |
| C(4)–C(5)–Fe(1)   | 70.3(6)   |
| C(1)–C(5)–Fe(1)   | 69.6(6)   |
| C(7)–C(6)–C(10)   | 107.7(9)  |
| C(7)–C(6)–P(1)    | 132.9(8)  |
| C(10)–C(6)–P(1)   | 119.4(8)  |
| C(7)–C(6)–Fe(1)   | 70.7(6)   |
| C(10)–C(6)–Fe(1)  | 68.8(5)   |
| P(1)–C(6)–Fe(1)   | 126.0(5)  |
| C(6)–C(7)–C(8)    | 110.1(10) |
| C(6)–C(7)–Fe(1)   | 69.6(5)   |
| C(8)–C(7)–Fe(1)   | 70.5(6)   |
| C(7)–C(8)–C(9)    | 107.4(10) |
| C(7)–C(8)–Fe(1)   | 69.8(6)   |
| C(9)–C(8)–Fe(1)   | 68.9(6)   |
| C(8)–C(9)–C(10)   | 109.3(10) |
| C(8)–C(9)–Fe(1)   | 70.7(6)   |
| C(10)–C(9)–Fe(1)  | 69.3(6)   |
| C(9)–C(10)–C(6)   | 105.5(10) |
| C(9)–C(10)–Fe(1)  | 69.7(6)   |
| C(6)–C(10)–Fe(1)  | 69.1(5)   |
| C(12)–C(11)–C(16) | 117.3(10) |
| C(12)–C(11)–P(1)  | 125.6(8)  |
| C(16)–C(11)–P(1)  | 117.1(8)  |
| C(11)–C(12)–C(13) | 121.1(12) |
| C(14)–C(13)–C(12) | 120.2(12) |
| C(15)–C(14)–C(13) | 120.0(11) |
| C(14)–C(15)–C(16) | 119.8(12) |
| C(15)–C(16)–C(11) | 121.3(12) |
| C(22)–C(17)–C(18) | 116.8(9)  |
| C(22)–C(17)–P(2)  | 123.7(7)  |
| C(18)–C(17)–P(2)  | 119.5(7)  |
| C(19)–C(18)–C(17) | 123.3(10) |
| C(20)–C(19)–C(18) | 119.1(11) |
| C(19)–C(20)–C(21) | 121.1(11) |
| C(20)–C(21)–C(22) | 119.1(11) |

|                      |            |
|----------------------|------------|
| C (17)–C (22)–C (21) | 120.6 (10) |
| C (28)–C (23)–C (24) | 113.4 (10) |
| C (28)–C (23)–P (1)  | 124.8 (9)  |
| C (24)–C (23)–P (1)  | 121.5 (8)  |
| C (25)–C (24)–C (23) | 127.3 (12) |
| C (24)–C (25)–C (26) | 117.9 (13) |
| C (25)–C (26)–C (27) | 118.5 (14) |
| C (26)–C (27)–C (28) | 119.8 (14) |
| C (23)–C (28)–C (27) | 123.1 (13) |
| C (30)–C (29)–C (34) | 118.0 (10) |
| C (30)–C (29)–P (2)  | 118.1 (9)  |
| C (34)–C (29)–P (2)  | 123.6 (8)  |
| C (29)–C (30)–C (31) | 121.0 (12) |
| C (32)–C (31)–C (30) | 119.1 (13) |
| C (33)–C (32)–C (31) | 120.5 (13) |
| C (32)–C (33)–C (34) | 119.5 (13) |
| C (29)–C (34)–C (33) | 121.7 (11) |
| C (42)–C (41)–C (45) | 108.0 (9)  |
| C (42)–C (41)–P (6)  | 123.6 (8)  |
| C (45)–C (41)–P (6)  | 128.2 (7)  |
| C (42)–C (41)–Fe (2) | 70.4 (6)   |
| C (45)–C (41)–Fe (2) | 69.9 (5)   |
| P (6)–C (41)–Fe (2)  | 122.1 (5)  |
| C (41)–C (42)–C (43) | 108.8 (10) |
| C (41)–C (42)–Fe (2) | 69.6 (6)   |
| C (43)–C (42)–Fe (2) | 69.9 (6)   |
| C (44)–C (43)–C (42) | 105.2 (10) |
| C (44)–C (43)–Fe (2) | 69.6 (6)   |
| C (42)–C (43)–Fe (2) | 68.4 (6)   |
| C (45)–C (44)–C (43) | 110.8 (10) |
| C (45)–C (44)–Fe (2) | 69.9 (6)   |
| C (43)–C (44)–Fe (2) | 70.0 (6)   |
| C (44)–C (45)–C (41) | 107.1 (9)  |
| C (44)–C (45)–Fe (2) | 70.6 (6)   |
| C (41)–C (45)–Fe (2) | 68.5 (5)   |
| C (50)–C (46)–C (47) | 107.3 (8)  |
| C (50)–C (46)–P (5)  | 125.1 (7)  |
| C (47)–C (46)–P (5)  | 127.4 (7)  |
| C (50)–C (46)–Fe (2) | 68.9 (5)   |
| C (47)–C (46)–Fe (2) | 69.5 (5)   |
| P (5)–C (46)–Fe (2)  | 123.5 (5)  |
| C (48)–C (47)–C (46) | 108.8 (9)  |
| C (48)–C (47)–Fe (2) | 71.1 (6)   |
| C (46)–C (47)–Fe (2) | 68.5 (5)   |



|                      |             |
|----------------------|-------------|
| C (47)–C (48)–C (49) | 106.1 (10)  |
| C (47)–C (48)–Fe (2) | 69.0 (6)    |
| C (49)–C (48)–Fe (2) | 67.7 (6)    |
| C (50)–C (49)–C (48) | 109.0 (9)   |
| C (50)–C (49)–Fe (2) | 68.8 (6)    |
| C (48)–C (49)–Fe (2) | 70.6 (6)    |
| C (46)–C (50)–C (49) | 108.7 (9)   |
| C (46)–C (50)–Fe (2) | 70.5 (6)    |
| C (49)–C (50)–Fe (2) | 70.5 (6)    |
| C (56)–C (51)–C (52) | 115.5 (9)   |
| C (56)–C (51)–P (5)  | 119.8 (8)   |
| C (52)–C (51)–P (5)  | 124.6 (8)   |
| C (51)–C (52)–C (53) | 121.8 (10)  |
| C (54)–C (53)–C (52) | 119.0 (11)  |
| C (55)–C (54)–C (53) | 120.4 (11)  |
| C (54)–C (55)–C (56) | 119.6 (11)  |
| C (55)–C (56)–C (51) | 123.7 (11)  |
| C (58)–C (57)–C (62) | 114.0 (9)   |
| C (58)–C (57)–P (5)  | 125.3 (8)   |
| C (62)–C (57)–P (5)  | 120.7 (8)   |
| C (57)–C (58)–C (59) | 123.7 (10)  |
| C (60)–C (59)–C (58) | 119.7 (11)  |
| C (59)–C (60)–C (61) | 120.2 (11)  |
| C (60)–C (61)–C (62) | 119.9 (11)  |
| C (57)–C (62)–C (61) | 122.4 (11)  |
| C (68)–C (63)–C (64) | 117.6 (10)  |
| C (68)–C (63)–P (6)  | 123.6 (8)   |
| C (64)–C (63)–P (6)  | 118.8 (8)   |
| C (63)–C (64)–C (65) | 121.0 (11)  |
| C (66)–C (65)–C (64) | 120.6 (12)  |
| C (65)–C (66)–C (67) | 118.3 (12)  |
| C (66)–C (67)–C (68) | 122.2 (12)  |
| C (63)–C (68)–C (67) | 120.2 (12)  |
| C (74)–C (69)–C (70) | 116.0 (10)  |
| C (74)–C (69)–P (6)  | 125.8 (8)   |
| C (70)–C (69)–P (6)  | 117.9 (8)   |
| C (71)–C (70)–C (69) | 122.1 (12)  |
| C (72)–C (71)–C (70) | 116.8 (12)  |
| C (71)–C (72)–C (73) | 121.7 (12)  |
| C (74)–C (73)–C (72) | 119.2 (12)  |
| C (73)–C (74)–C (69) | 124.3 (12)  |
| P (2)–Co (1)–P (1)   | 110.19 (11) |
| P (2)–Co (1)–P (3)   | 106.47 (12) |
| P (1)–Co (1)–P (3)   | 107.43 (12) |

|                  |            |
|------------------|------------|
| P(2)-Co(1)-P(4)  | 114.25(12) |
| P(1)-Co(1)-P(4)  | 114.58(12) |
| P(3)-Co(1)-P(4)  | 103.12(14) |
| P(6)-Co(2)-P(5)  | 106.51(11) |
| P(6)-Co(2)-P(7)  | 109.09(12) |
| P(5)-Co(2)-P(7)  | 112.05(11) |
| P(6)-Co(2)-P(8)  | 112.68(11) |
| P(5)-Co(2)-P(8)  | 110.28(11) |
| P(7)-Co(2)-P(8)  | 106.32(12) |
| C(10)-Fe(1)-C(5) | 110.2(4)   |
| C(10)-Fe(1)-C(2) | 138.6(4)   |
| C(5)-Fe(1)-C(2)  | 68.4(4)    |
| C(10)-Fe(1)-C(9) | 41.0(4)    |
| C(5)-Fe(1)-C(9)  | 111.0(5)   |
| C(2)-Fe(1)-C(9)  | 179.2(5)   |
| C(10)-Fe(1)-C(6) | 42.1(4)    |
| C(5)-Fe(1)-C(6)  | 140.1(4)   |
| C(2)-Fe(1)-C(6)  | 111.4(4)   |
| C(9)-Fe(1)-C(6)  | 68.7(4)    |
| C(10)-Fe(1)-C(1) | 109.7(4)   |
| C(5)-Fe(1)-C(1)  | 41.0(4)    |
| C(2)-Fe(1)-C(1)  | 40.9(3)    |
| C(9)-Fe(1)-C(1)  | 138.3(5)   |
| C(6)-Fe(1)-C(1)  | 111.4(4)   |
| C(10)-Fe(1)-C(4) | 138.5(5)   |
| C(5)-Fe(1)-C(4)  | 40.4(4)    |
| C(2)-Fe(1)-C(4)  | 68.3(4)    |
| C(9)-Fe(1)-C(4)  | 111.6(5)   |
| C(6)-Fe(1)-C(4)  | 179.4(5)   |
| C(1)-Fe(1)-C(4)  | 68.7(4)    |
| C(10)-Fe(1)-C(3) | 178.0(5)   |
| C(5)-Fe(1)-C(3)  | 67.8(5)    |
| C(2)-Fe(1)-C(3)  | 41.0(4)    |
| C(9)-Fe(1)-C(3)  | 139.5(5)   |
| C(6)-Fe(1)-C(3)  | 139.4(4)   |
| C(1)-Fe(1)-C(3)  | 68.8(4)    |
| C(4)-Fe(1)-C(3)  | 40.0(4)    |
| C(10)-Fe(1)-C(7) | 68.6(4)    |
| C(5)-Fe(1)-C(7)  | 178.4(4)   |
| C(2)-Fe(1)-C(7)  | 113.3(4)   |
| C(9)-Fe(1)-C(7)  | 67.3(5)    |
| C(6)-Fe(1)-C(7)  | 39.7(4)    |
| C(1)-Fe(1)-C(7)  | 140.3(4)   |
| C(4)-Fe(1)-C(7)  | 139.8(4)   |

|                   |          |
|-------------------|----------|
| C(3)–Fe(1)–C(7)   | 113.4(5) |
| C(10)–Fe(1)–C(8)  | 68.9(4)  |
| C(5)–Fe(1)–C(8)   | 138.9(4) |
| C(2)–Fe(1)–C(8)   | 140.4(4) |
| C(9)–Fe(1)–C(8)   | 40.4(4)  |
| C(6)–Fe(1)–C(8)   | 67.8(4)  |
| C(1)–Fe(1)–C(8)   | 178.5(4) |
| C(4)–Fe(1)–C(8)   | 112.1(4) |
| C(3)–Fe(1)–C(8)   | 112.6(5) |
| C(7)–Fe(1)–C(8)   | 39.7(4)  |
| C(41)–Fe(2)–C(50) | 108.3(4) |
| C(41)–Fe(2)–C(42) | 40.0(3)  |
| C(50)–Fe(2)–C(42) | 135.7(4) |
| C(41)–Fe(2)–C(45) | 41.6(4)  |
| C(50)–Fe(2)–C(45) | 110.2(4) |
| C(42)–Fe(2)–C(45) | 68.5(4)  |
| C(41)–Fe(2)–C(46) | 109.2(4) |
| C(50)–Fe(2)–C(46) | 40.6(4)  |
| C(42)–Fe(2)–C(46) | 109.8(4) |
| C(45)–Fe(2)–C(46) | 138.4(4) |
| C(41)–Fe(2)–C(49) | 136.8(4) |
| C(50)–Fe(2)–C(49) | 40.7(4)  |
| C(42)–Fe(2)–C(49) | 176.1(5) |
| C(45)–Fe(2)–C(49) | 110.5(5) |
| C(46)–Fe(2)–C(49) | 68.3(4)  |
| C(41)–Fe(2)–C(44) | 67.9(4)  |
| C(50)–Fe(2)–C(44) | 139.9(4) |
| C(42)–Fe(2)–C(44) | 67.9(4)  |
| C(45)–Fe(2)–C(44) | 39.5(4)  |
| C(46)–Fe(2)–C(44) | 177.1(4) |
| C(49)–Fe(2)–C(44) | 113.8(4) |
| C(41)–Fe(2)–C(43) | 69.1(4)  |
| C(50)–Fe(2)–C(43) | 177.3(4) |
| C(42)–Fe(2)–C(43) | 41.7(4)  |
| C(45)–Fe(2)–C(43) | 68.5(4)  |
| C(46)–Fe(2)–C(43) | 138.9(4) |
| C(49)–Fe(2)–C(43) | 141.8(5) |
| C(44)–Fe(2)–C(43) | 40.4(4)  |
| C(41)–Fe(2)–C(47) | 139.7(4) |
| C(50)–Fe(2)–C(47) | 69.4(4)  |
| C(42)–Fe(2)–C(47) | 112.8(4) |
| C(45)–Fe(2)–C(47) | 178.6(4) |
| C(46)–Fe(2)–C(47) | 42.0(4)  |
| C(49)–Fe(2)–C(47) | 68.3(4)  |

|                   |          |
|-------------------|----------|
| C(44)-Fe(2)-C(47) | 140.1(4) |
| C(43)-Fe(2)-C(47) | 112.0(4) |
| C(41)-Fe(2)-C(48) | 178.0(4) |
| C(50)-Fe(2)-C(48) | 69.7(4)  |
| C(42)-Fe(2)-C(48) | 141.5(4) |
| C(45)-Fe(2)-C(48) | 138.8(4) |
| C(46)-Fe(2)-C(48) | 69.3(4)  |
| C(49)-Fe(2)-C(48) | 41.7(4)  |
| C(44)-Fe(2)-C(48) | 113.6(4) |
| C(43)-Fe(2)-C(48) | 112.9(5) |
| C(47)-Fe(2)-C(48) | 39.9(4)  |
| C(6)-P(1)-C(11)   | 97.8(4)  |
| C(6)-P(1)-C(23)   | 98.6(5)  |
| C(11)-P(1)-C(23)  | 97.5(5)  |
| C(6)-P(1)-Co(1)   | 116.9(3) |
| C(11)-P(1)-Co(1)  | 121.3(4) |
| C(23)-P(1)-Co(1)  | 120.1(3) |
| C(17)-P(2)-C(29)  | 96.9(4)  |
| C(17)-P(2)-C(1)   | 97.5(4)  |
| C(29)-P(2)-C(1)   | 100.3(4) |
| C(17)-P(2)-Co(1)  | 117.8(3) |
| C(29)-P(2)-Co(1)  | 119.6(3) |
| C(1)-P(2)-Co(1)   | 120.1(3) |
| C(40)-P(3)-C(38)  | 97.7(6)  |
| C(40)-P(3)-C(39)  | 99.1(7)  |
| C(38)-P(3)-C(39)  | 100.7(6) |
| C(40)-P(3)-Co(1)  | 119.6(5) |
| C(38)-P(3)-Co(1)  | 117.0(4) |
| C(39)-P(3)-Co(1)  | 118.8(5) |
| C(35)-P(4)-C(36)  | 99.3(6)  |
| C(35)-P(4)-C(37)  | 95.8(6)  |
| C(36)-P(4)-C(37)  | 97.9(7)  |
| C(35)-P(4)-Co(1)  | 117.6(4) |
| C(36)-P(4)-Co(1)  | 122.0(5) |
| C(37)-P(4)-Co(1)  | 119.2(5) |
| C(51)-P(5)-C(46)  | 103.2(5) |
| C(51)-P(5)-C(57)  | 96.8(4)  |
| C(46)-P(5)-C(57)  | 99.1(4)  |
| C(51)-P(5)-Co(2)  | 112.1(3) |
| C(46)-P(5)-Co(2)  | 120.2(3) |
| C(57)-P(5)-Co(2)  | 121.6(3) |
| C(41)-P(6)-C(63)  | 99.4(4)  |
| C(41)-P(6)-C(69)  | 100.5(4) |
| C(63)-P(6)-C(69)  | 99.3(4)  |

|                  |          |
|------------------|----------|
| C(41)–P(6)–Co(2) | 118.6(3) |
| C(63)–P(6)–Co(2) | 121.5(3) |
| C(69)–P(6)–Co(2) | 113.8(3) |
| C(80)–P(7)–C(79) | 98.7(6)  |
| C(80)–P(7)–C(78) | 98.3(6)  |
| C(79)–P(7)–C(78) | 99.1(5)  |
| C(80)–P(7)–Co(2) | 117.8(4) |
| C(79)–P(7)–Co(2) | 122.8(4) |
| C(78)–P(7)–Co(2) | 115.7(4) |
| C(76)–P(8)–C(77) | 97.0(5)  |
| C(76)–P(8)–C(75) | 99.6(5)  |
| C(77)–P(8)–C(75) | 98.7(6)  |
| C(76)–P(8)–Co(2) | 123.6(4) |
| C(77)–P(8)–Co(2) | 117.1(4) |
| C(75)–P(8)–Co(2) | 116.2(3) |

---

Symmetry transformations used to generate equivalent atoms:

Table 4. Anisotropic displacement parameters ( $\text{\AA}^2 \times 10^3$ ) for Complex 8.  
 The anisotropic displacement factor exponent takes the form:  
 $-2 \pi^2 [ h^2 a^{*2} U_{11} + \dots + 2 h k a^* b^* U_{12} ]$

|       | U11     | U22     | U33     | U23     | U13    | U12     |
|-------|---------|---------|---------|---------|--------|---------|
| C(1)  | 52(6)   | 24(5)   | 35(6)   | -7(4)   | 1(5)   | -11(5)  |
| C(2)  | 35(6)   | 30(5)   | 58(7)   | -14(5)  | 11(5)  | -4(5)   |
| C(3)  | 78(9)   | 42(6)   | 50(7)   | -6(6)   | -18(6) | 8(6)    |
| C(4)  | 47(7)   | 73(8)   | 32(6)   | 0(6)    | -13(5) | -20(6)  |
| C(5)  | 78(8)   | 51(7)   | 35(6)   | -14(5)  | -10(6) | -12(6)  |
| C(6)  | 52(7)   | 42(6)   | 32(6)   | -3(5)   | 1(5)   | -23(5)  |
| C(7)  | 28(6)   | 62(7)   | 59(7)   | -16(6)  | -2(5)  | -16(5)  |
| C(8)  | 43(7)   | 64(8)   | 66(8)   | -12(7)  | -16(6) | -12(6)  |
| C(9)  | 125(12) | 48(7)   | 45(7)   | -18(6)  | -18(7) | -24(8)  |
| C(10) | 62(7)   | 39(6)   | 39(6)   | -10(5)  | -3(5)  | -14(5)  |
| C(11) | 64(7)   | 36(6)   | 40(6)   | -3(5)   | -5(5)  | -9(5)   |
| C(12) | 69(8)   | 59(8)   | 65(8)   | -12(7)  | -5(6)  | -21(7)  |
| C(13) | 106(11) | 52(8)   | 72(10)  | -11(7)  | 9(8)   | -42(8)  |
| C(14) | 113(12) | 43(7)   | 52(8)   | 4(6)    | 26(8)  | -4(8)   |
| C(15) | 88(10)  | 57(8)   | 63(9)   | -10(7)  | -9(7)  | -1(7)   |
| C(16) | 77(9)   | 54(7)   | 52(8)   | -4(6)   | 4(6)   | -10(6)  |
| C(17) | 47(6)   | 36(6)   | 35(6)   | -12(5)  | -2(5)  | 1(5)    |
| C(18) | 54(7)   | 51(7)   | 57(7)   | -30(6)  | 1(5)   | -2(6)   |
| C(19) | 49(7)   | 54(7)   | 78(9)   | -24(7)  | 8(6)   | 0(6)    |
| C(20) | 69(9)   | 75(9)   | 87(10)  | -60(8)  | -21(7) | 20(7)   |
| C(21) | 72(8)   | 76(9)   | 46(7)   | -20(7)  | 3(6)   | 12(7)   |
| C(22) | 28(6)   | 58(7)   | 74(8)   | -28(6)  | 3(5)   | 5(5)    |
| C(23) | 37(6)   | 52(7)   | 38(6)   | -17(5)  | 7(5)   | -4(5)   |
| C(24) | 121(12) | 55(8)   | 64(9)   | -14(7)  | 37(8)  | 6(8)    |
| C(25) | 131(13) | 54(8)   | 78(10)  | -20(7)  | 27(9)  | 5(8)    |
| C(26) | 98(12)  | 67(10)  | 135(15) | -36(10) | 0(11)  | 26(9)   |
| C(27) | 183(19) | 103(13) | 112(14) | -10(11) | 87(13) | 45(13)  |
| C(28) | 108(12) | 63(8)   | 105(12) | -15(8)  | 60(10) | 12(8)   |
| C(29) | 44(6)   | 45(6)   | 45(6)   | -24(5)  | 3(5)   | -15(5)  |
| C(30) | 57(8)   | 71(8)   | 57(8)   | -10(6)  | -6(6)  | -21(7)  |
| C(31) | 76(10)  | 144(15) | 78(10)  | -49(11) | -7(8)  | -51(11) |
| C(32) | 140(15) | 54(9)   | 70(10)  | -30(8)  | 31(10) | -51(10) |
| C(33) | 54(8)   | 68(8)   | 63(8)   | -27(7)  | 12(7)  | -8(7)   |
| C(34) | 62(7)   | 39(6)   | 52(7)   | -13(5)  | 14(6)  | -16(6)  |

|       |         |         |         |         |        |         |
|-------|---------|---------|---------|---------|--------|---------|
| C(35) | 57(8)   | 95(10)  | 86(10)  | -6(8)   | -6(7)  | 15(7)   |
| C(36) | 115(12) | 36(7)   | 132(13) | -8(8)   | 20(10) | 2(7)    |
| C(37) | 112(12) | 103(11) | 60(9)   | -4(8)   | -23(8) | 3(9)    |
| C(38) | 104(11) | 112(11) | 60(8)   | -48(8)  | 24(8)  | -51(9)  |
| C(39) | 80(10)  | 124(12) | 105(12) | -62(10) | 7(8)   | -44(9)  |
| C(40) | 240(20) | 42(8)   | 78(10)  | -31(7)  | 18(11) | -26(10) |
| C(41) | 27(5)   | 52(6)   | 43(6)   | -27(5)  | 1(4)   | -4(5)   |
| C(42) | 55(7)   | 56(7)   | 49(7)   | -28(6)  | 2(5)   | -20(6)  |
| C(43) | 60(8)   | 76(9)   | 77(9)   | -51(8)  | -4(6)  | 10(7)   |
| C(44) | 78(9)   | 36(6)   | 73(9)   | -27(6)  | -21(7) | 11(6)   |
| C(45) | 38(6)   | 40(6)   | 78(8)   | -32(6)  | 3(6)   | -4(5)   |
| C(46) | 45(6)   | 30(5)   | 44(6)   | -15(5)  | -6(5)  | -10(5)  |
| C(47) | 49(7)   | 39(6)   | 62(7)   | -25(5)  | -5(5)  | -10(5)  |
| C(48) | 65(8)   | 53(7)   | 76(9)   | -37(7)  | -14(7) | 7(6)    |
| C(49) | 80(9)   | 45(7)   | 53(7)   | -9(6)   | -33(7) | 5(6)    |
| C(50) | 54(7)   | 39(6)   | 51(7)   | -16(5)  | -9(5)  | -1(5)   |
| C(51) | 39(6)   | 44(6)   | 41(6)   | -21(5)  | 10(5)  | -14(5)  |
| C(52) | 63(7)   | 58(7)   | 39(6)   | -16(6)  | 6(5)   | -8(6)   |
| C(53) | 80(9)   | 75(9)   | 48(7)   | -28(7)  | -3(6)  | 4(7)    |
| C(54) | 41(7)   | 104(11) | 74(9)   | -60(8)  | 10(6)  | -20(7)  |
| C(55) | 62(8)   | 66(8)   | 71(9)   | -49(7)  | -5(6)  | 5(6)    |
| C(56) | 48(6)   | 46(6)   | 53(7)   | -26(5)  | -5(5)  | 0(5)    |
| C(57) | 45(6)   | 32(5)   | 44(6)   | -15(5)  | 1(5)   | 2(5)    |
| C(58) | 67(8)   | 76(8)   | 46(7)   | -31(6)  | 5(6)   | -31(7)  |
| C(59) | 58(8)   | 68(8)   | 66(8)   | -33(7)  | 19(6)  | -38(6)  |
| C(60) | 49(7)   | 76(9)   | 63(9)   | -21(7)  | 17(6)  | -14(6)  |
| C(61) | 102(11) | 93(10)  | 39(7)   | -13(7)  | 44(7)  | -29(9)  |
| C(62) | 76(8)   | 71(8)   | 53(8)   | -33(7)  | 2(6)   | -31(7)  |
| C(63) | 29(5)   | 54(7)   | 53(7)   | -19(6)  | 0(5)   | -13(5)  |
| C(64) | 43(6)   | 61(7)   | 58(8)   | -21(6)  | 4(5)   | -1(6)   |
| C(65) | 115(12) | 88(10)  | 33(7)   | -4(7)   | 11(7)  | 21(9)   |
| C(66) | 89(10)  | 56(9)   | 94(12)  | -13(8)  | 27(9)  | -21(8)  |
| C(67) | 74(9)   | 58(8)   | 99(11)  | -19(8)  | 1(8)   | -26(7)  |
| C(68) | 56(7)   | 55(7)   | 77(9)   | -18(7)  | -1(6)  | -24(6)  |
| C(69) | 27(5)   | 43(6)   | 60(7)   | -24(5)  | 5(5)   | -16(5)  |
| C(70) | 76(9)   | 93(10)  | 75(9)   | -46(8)  | -9(7)  | -4(8)   |
| C(71) | 61(8)   | 92(10)  | 89(10)  | -44(9)  | -34(7) | 9(7)    |
| C(72) | 117(12) | 71(9)   | 74(10)  | -29(8)  | -51(9) | -20(9)  |
| C(73) | 54(8)   | 132(13) | 81(10)  | -62(9)  | -10(7) | -2(8)   |
| C(74) | 57(8)   | 90(9)   | 75(9)   | -54(8)  | -9(7)  | -5(7)   |
| C(75) | 35(6)   | 98(9)   | 63(8)   | -41(7)  | 12(5)  | -9(6)   |
| C(76) | 95(9)   | 66(8)   | 43(7)   | -28(6)  | 9(6)   | -14(7)  |
| C(77) | 94(10)  | 46(7)   | 94(10)  | -34(7)  | -5(8)  | 18(7)   |
| C(78) | 143(12) | 28(6)   | 54(8)   | -5(5)   | 13(8)  | 4(7)    |

|        |         |          |        |         |         |         |
|--------|---------|----------|--------|---------|---------|---------|
| C (79) | 77 (9)  | 86 (9)   | 41 (7) | -29 (6) | 1 (6)   | 2 (7)   |
| C (80) | 89 (10) | 101 (10) | 61 (9) | -15 (8) | -7 (7)  | 22 (8)  |
| Co (1) | 42 (1)  | 39 (1)   | 37 (1) | -10 (1) | -4 (1)  | -5 (1)  |
| Co (2) | 38 (1)  | 40 (1)   | 38 (1) | -16 (1) | 0 (1)   | -3 (1)  |
| Fe (1) | 43 (1)  | 42 (1)   | 38 (1) | -13 (1) | -5 (1)  | -6 (1)  |
| Fe (2) | 43 (1)  | 36 (1)   | 51 (1) | -19 (1) | -3 (1)  | -2 (1)  |
| P (1)  | 50 (2)  | 42 (2)   | 34 (2) | -11 (1) | -2 (1)  | -9 (1)  |
| P (2)  | 36 (2)  | 37 (1)   | 38 (2) | -11 (1) | 0 (1)   | -6 (1)  |
| P (3)  | 75 (2)  | 54 (2)   | 51 (2) | -23 (2) | 7 (2)   | -20 (2) |
| P (4)  | 58 (2)  | 54 (2)   | 55 (2) | -3 (2)  | -11 (2) | 4 (2)   |
| P (5)  | 39 (2)  | 33 (1)   | 34 (1) | -14 (1) | 0 (1)   | -7 (1)  |
| P (6)  | 40 (2)  | 43 (2)   | 41 (2) | -19 (1) | -2 (1)  | -7 (1)  |
| P (7)  | 63 (2)  | 47 (2)   | 41 (2) | -12 (1) | -3 (1)  | 5 (2)   |
| P (8)  | 42 (2)  | 55 (2)   | 47 (2) | -21 (1) | 2 (1)   | -3 (1)  |

---



Table 5. Hydrogen coordinates ( $\times 10^4$ ) and isotropic displacement parameters ( $\text{\AA}^2 \times 10^3$ ) for Complex 8.

|        | x     | y     | z    | U(eq) |
|--------|-------|-------|------|-------|
| H(2)   | 2828  | -122  | 3310 | 50    |
| H(3)   | 4384  | -277  | 4311 | 71    |
| H(4)   | 3495  | 504   | 5050 | 65    |
| H(5)   | 1400  | 1144  | 4522 | 65    |
| H(7)   | 5394  | 1155  | 2688 | 61    |
| H(8)   | 5796  | 1543  | 3749 | 72    |
| H(9)   | 3902  | 2380  | 3905 | 85    |
| H(10)  | 2309  | 2528  | 2919 | 56    |
| H(12)  | 4600  | 2976  | 1697 | 79    |
| H(13)  | 5100  | 4103  | 833  | 94    |
| H(14)  | 4232  | 4445  | -263 | 91    |
| H(15)  | 2776  | 3702  | -483 | 87    |
| H(16)  | 2092  | 2653  | 419  | 77    |
| H(18)  | -117  | 2500  | 2884 | 62    |
| H(19)  | -1166 | 3237  | 3428 | 72    |
| H(20)  | -2281 | 2704  | 4446 | 83    |
| H(21)  | -2303 | 1409  | 4971 | 79    |
| H(22)  | -1233 | 655   | 4410 | 63    |
| H(24)  | 3719  | 231   | 2345 | 100   |
| H(25)  | 4904  | -624  | 2034 | 108   |
| H(26)  | 5998  | -250  | 955  | 121   |
| H(27)  | 5761  | 979   | 222  | 173   |
| H(28)  | 4529  | 1826  | 598  | 118   |
| H(30)  | -2035 | 627   | 2807 | 77    |
| H(31)  | -3368 | -386  | 3143 | 114   |
| H(32)  | -2646 | -1537 | 3920 | 102   |
| H(33)  | -713  | -1659 | 4377 | 73    |
| H(34)  | 596   | -650  | 4036 | 62    |
| H(35A) | -2225 | 2221  | 2256 | 130   |
| H(35B) | -2545 | 1973  | 1616 | 130   |
| H(35C) | -2620 | 2827  | 1534 | 130   |
| H(36A) | -787  | 3739  | 1059 | 151   |
| H(36B) | 601   | 3503  | 1322 | 151   |
| H(36C) | -530  | 3436  | 1874 | 151   |
| H(37A) | -1203 | 2231  | 435  | 147   |

|        |       |      |      |     |
|--------|-------|------|------|-----|
| H(37B) | -54   | 2768 | 228  | 147 |
| H(37C) | -1420 | 3083 | 344  | 147 |
| H(38A) | 1999  | 1111 | 547  | 130 |
| H(38B) | 694   | 1058 | 224  | 130 |
| H(38C) | 1544  | 329  | 565  | 130 |
| H(39A) | -1631 | 1018 | 1059 | 144 |
| H(39B) | -1655 | 254  | 1696 | 144 |
| H(39C) | -1195 | 267  | 938  | 144 |
| H(40A) | 861   | -599 | 1589 | 173 |
| H(40B) | 443   | -541 | 2329 | 173 |
| H(40C) | 1837  | -358 | 2031 | 173 |
| H(42)  | 5387  | 5755 | 1621 | 60  |
| H(43)  | 7273  | 4765 | 1710 | 78  |
| H(44)  | 6630  | 3555 | 2717 | 72  |
| H(45)  | 4458  | 3756 | 3230 | 59  |
| H(47)  | 7911  | 5993 | 2683 | 57  |
| H(48)  | 8653  | 4640 | 3417 | 73  |
| H(49)  | 6763  | 4047 | 4313 | 73  |
| H(50)  | 4925  | 5030 | 4120 | 57  |
| H(52)  | 5823  | 6181 | 4464 | 64  |
| H(53)  | 5652  | 6756 | 5322 | 79  |
| H(54)  | 4810  | 7969 | 5025 | 78  |
| H(55)  | 4127  | 8595 | 3900 | 72  |
| H(56)  | 4347  | 8039 | 3058 | 56  |
| H(58)  | 7081  | 7671 | 3012 | 72  |
| H(59)  | 8391  | 8518 | 2205 | 73  |
| H(60)  | 8522  | 8576 | 1061 | 77  |
| H(61)  | 7351  | 7794 | 699  | 97  |
| H(62)  | 5943  | 6995 | 1485 | 75  |
| H(64)  | 2629  | 5214 | 4108 | 64  |
| H(65)  | 1664  | 4340 | 5110 | 101 |
| H(66)  | 974   | 3223 | 5061 | 99  |
| H(67)  | 1163  | 3004 | 4001 | 94  |
| H(68)  | 2065  | 3874 | 2986 | 76  |
| H(70)  | 368   | 5630 | 2392 | 92  |
| H(71)  | -1020 | 5684 | 1494 | 92  |
| H(72)  | -198  | 5368 | 543  | 100 |
| H(73)  | 1933  | 5033 | 471  | 99  |
| H(74)  | 3230  | 5007 | 1335 | 80  |
| H(75A) | -427  | 6677 | 3641 | 93  |
| H(75B) | 180   | 5943 | 3546 | 93  |
| H(75C) | -174  | 6639 | 2877 | 93  |
| H(76A) | 1166  | 6731 | 4499 | 99  |
| H(76B) | 2596  | 6947 | 4351 | 99  |

|        |      |      |      |     |
|--------|------|------|------|-----|
| H(76C) | 2217 | 6115 | 4499 | 99  |
| H(77A) | 1003 | 8056 | 2628 | 114 |
| H(77B) | 2038 | 8127 | 3137 | 114 |
| H(77C) | 649  | 7917 | 3430 | 114 |
| H(78A) | 3505 | 8546 | 843  | 117 |
| H(78B) | 4180 | 8289 | 1573 | 117 |
| H(78C) | 2758 | 8586 | 1524 | 117 |
| H(79A) | 3149 | 6727 | 698  | 100 |
| H(79B) | 4424 | 7085 | 771  | 100 |
| H(79C) | 3324 | 7593 | 326  | 100 |
| H(80A) | 1230 | 7940 | 824  | 132 |
| H(80B) | 786  | 7728 | 1623 | 132 |
| H(80C) | 867  | 7113 | 1262 | 132 |

---

Table 6. Torsion angles [deg] for Complex 8.

---
